# Supplementary material for: Massively parallel single-cell B-cell receptor sequencing enables rapid discovery of diverse antigen-reactive antibodies
Source: PubMed Central journal article supplement (PMC6689056; doi:10.1038/s42003-019-0551-y), 2019-08-09
Supplement: 42003_2019_551_MOESM1_ESM.pdf [file 42003_2019_551_MOESM1_ESM.pdf]

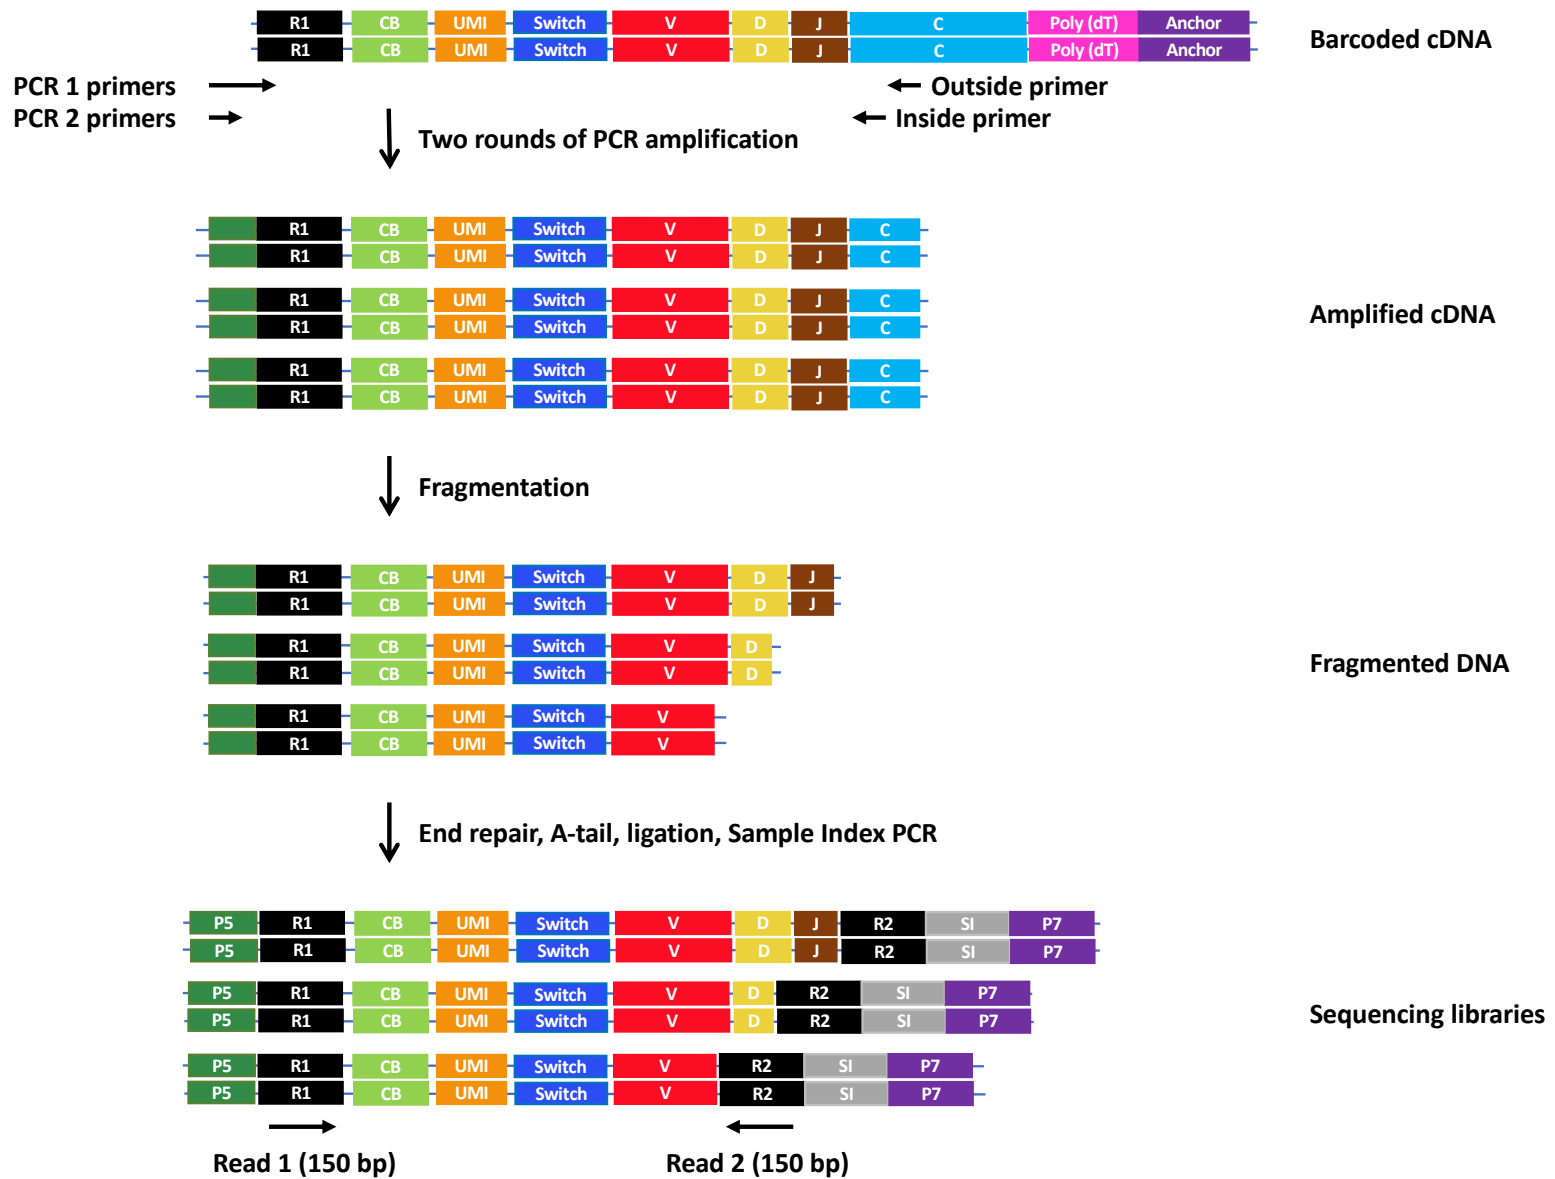

**Supplementary Figure 1.** Schematic of single-cell cDNA generation and library construction following the manufacturer's user guide (10x Genomics, Pleasanton, CA, CG000086\_SingleCellIVDJReagentKitsUserGuide\_RevB). Only heavy chain is shown.

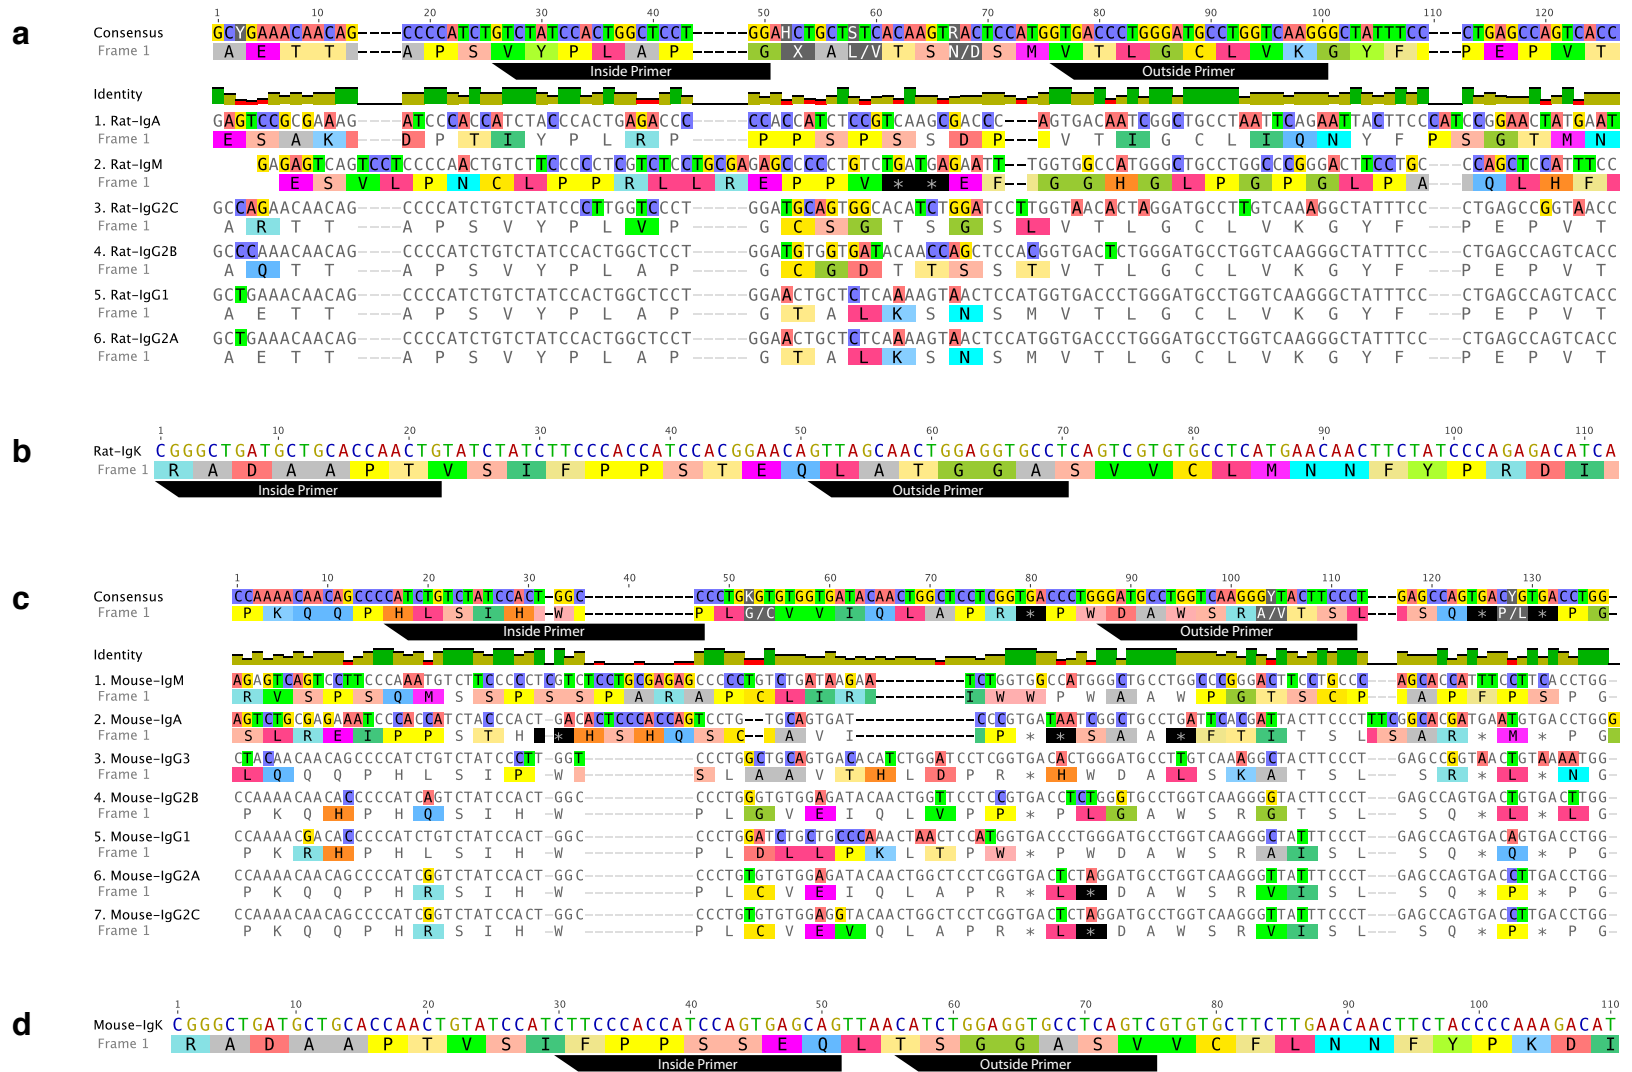

**Supplementary Figure 2.** Custom PCR primers targeting the rat and mouse heavy- and light-chain constant regions. (a) Multiple sequence alignment of rat heavy-chain isotype constant regions. (b) Rat  $\kappa$  light-chain constant region. (c) Multiple sequence alignment of mouse heavy-chain isotype constant regions. (d) Mouse  $\kappa$  light-chain constant region.

Rat 1

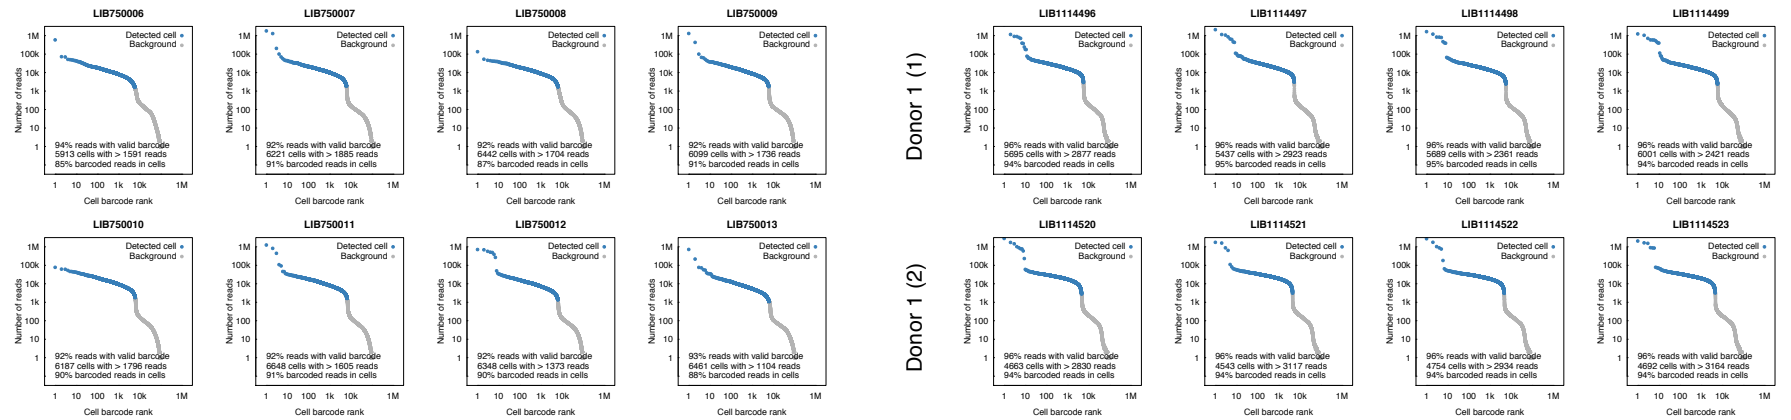

Rat 2

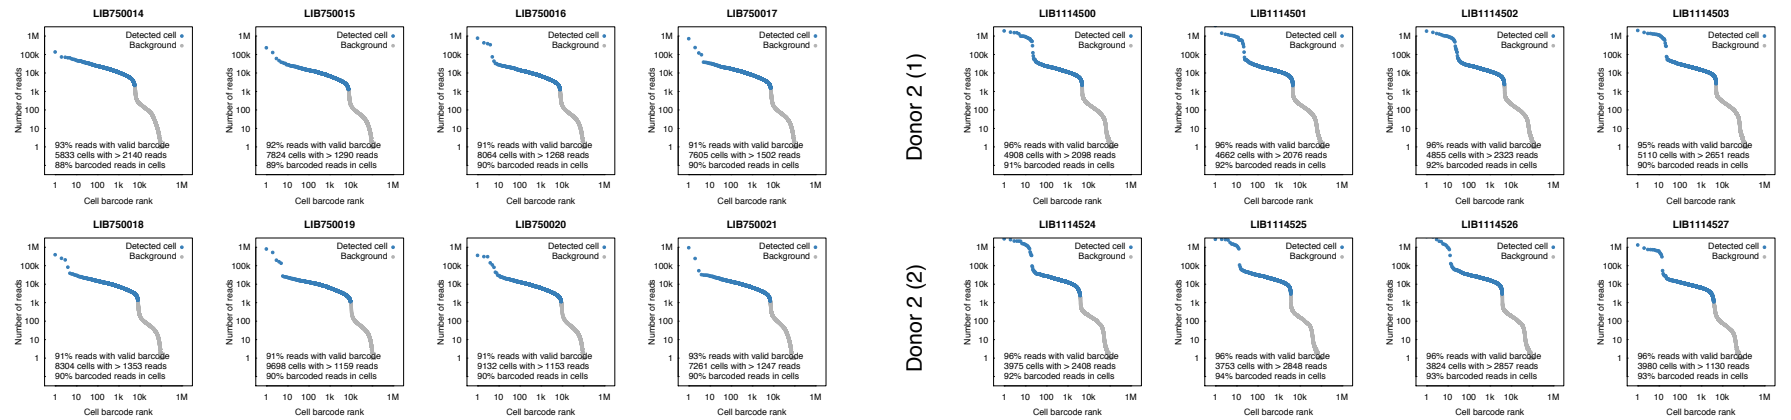

Mouse 1

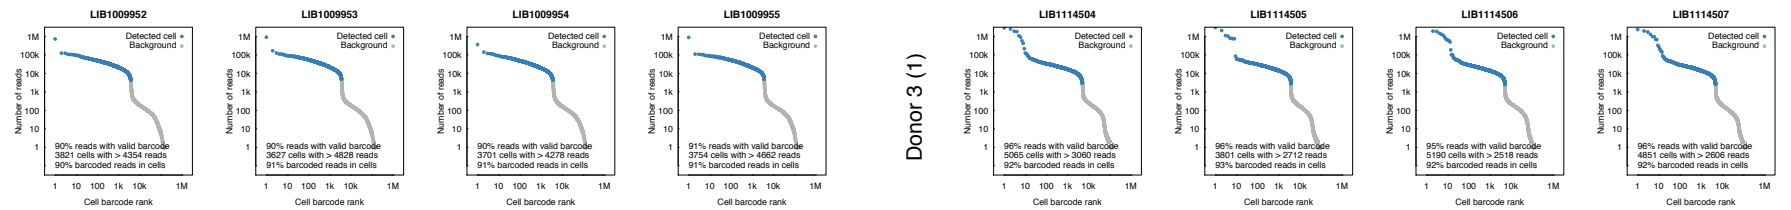

Mouse 2

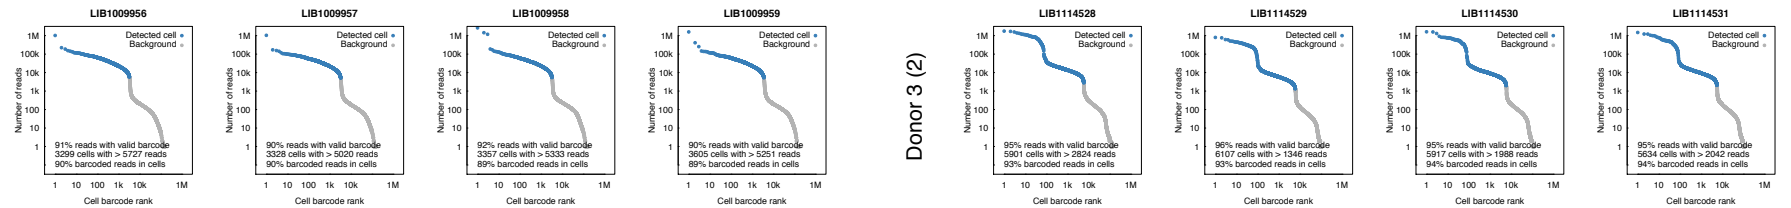

**Supplementary Figure 3.** Cell detection. Number of reads per barcode plotted against barcode rank for each library, barcodes for detected cells are colored in blue.

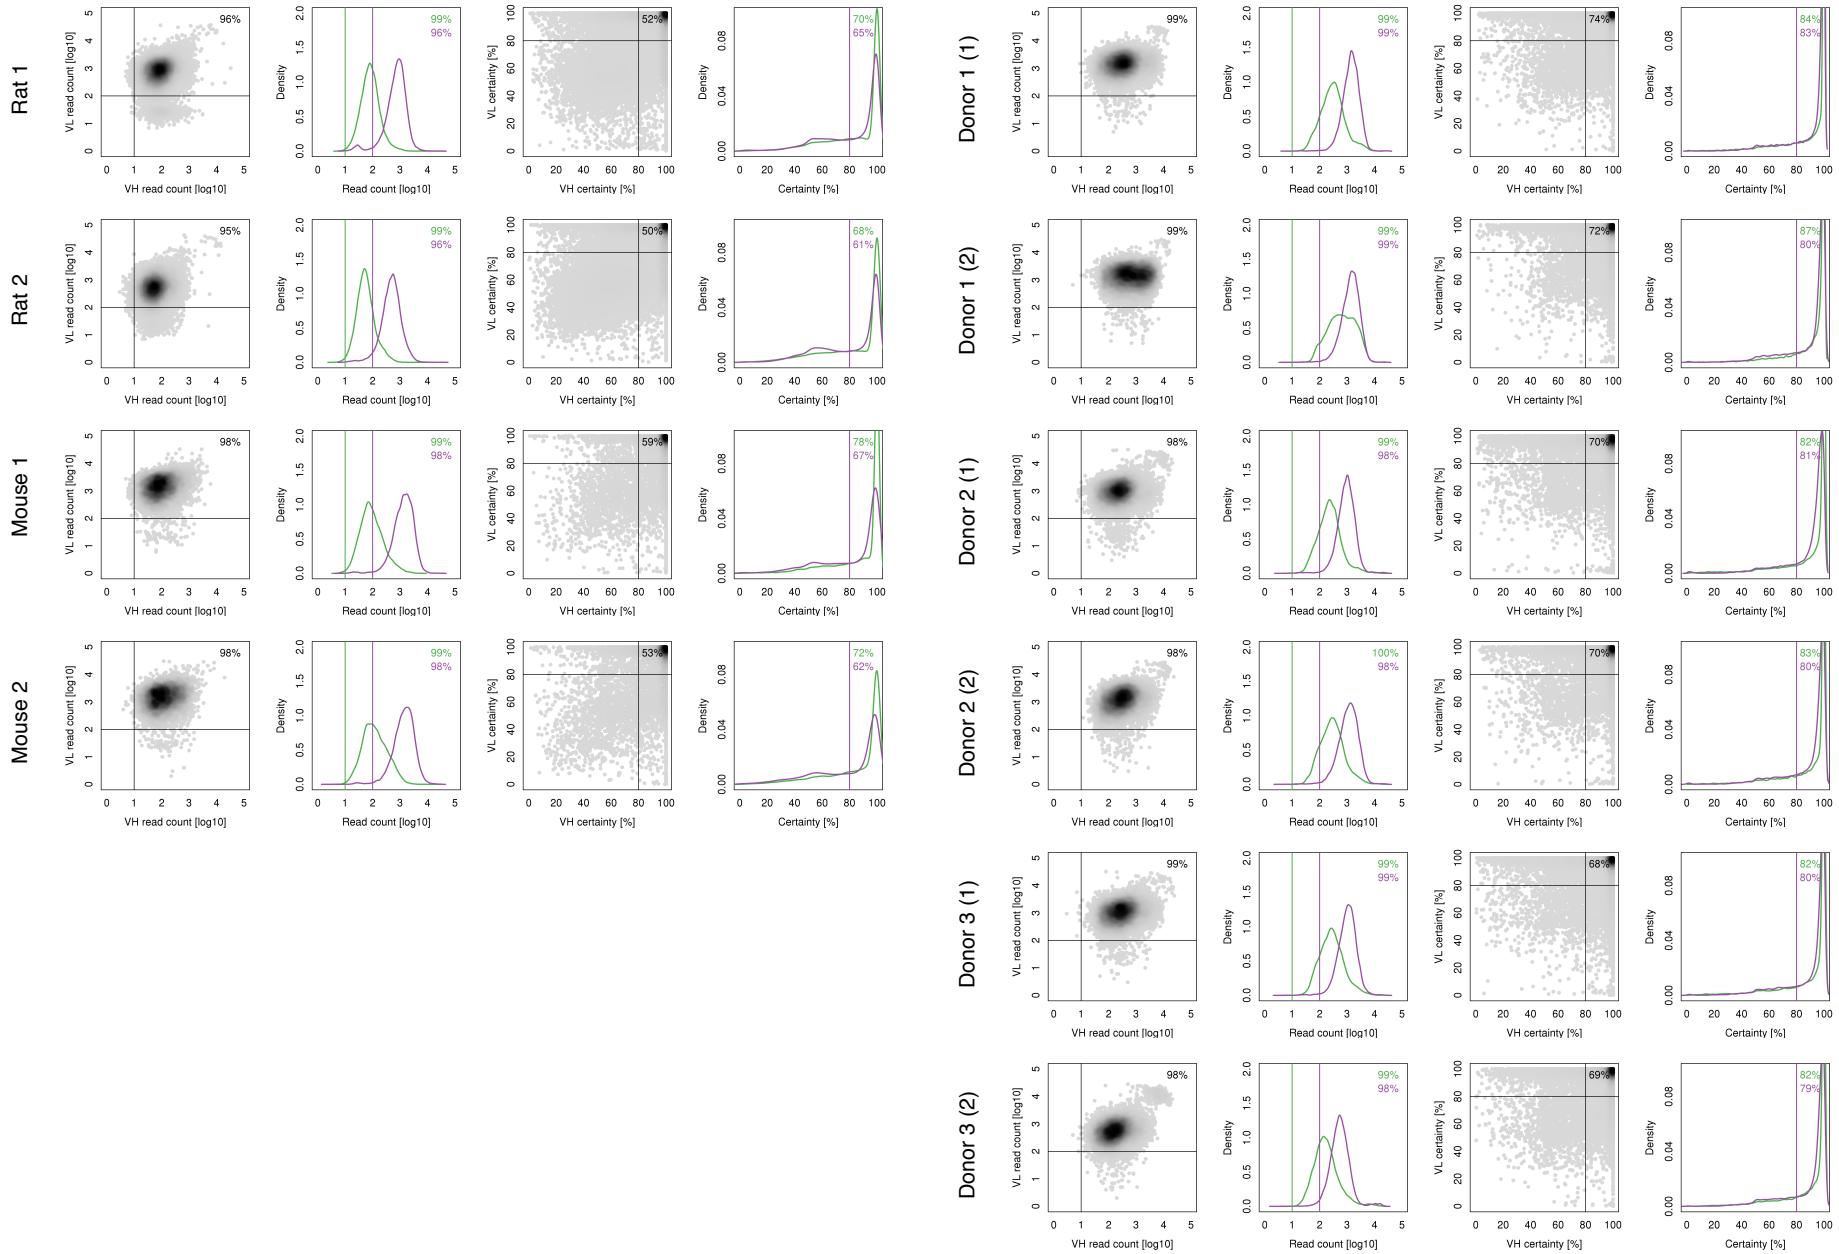

**Supplementary Figure 4.** Cell quality filtering. Otherwise as in Figure 2b.

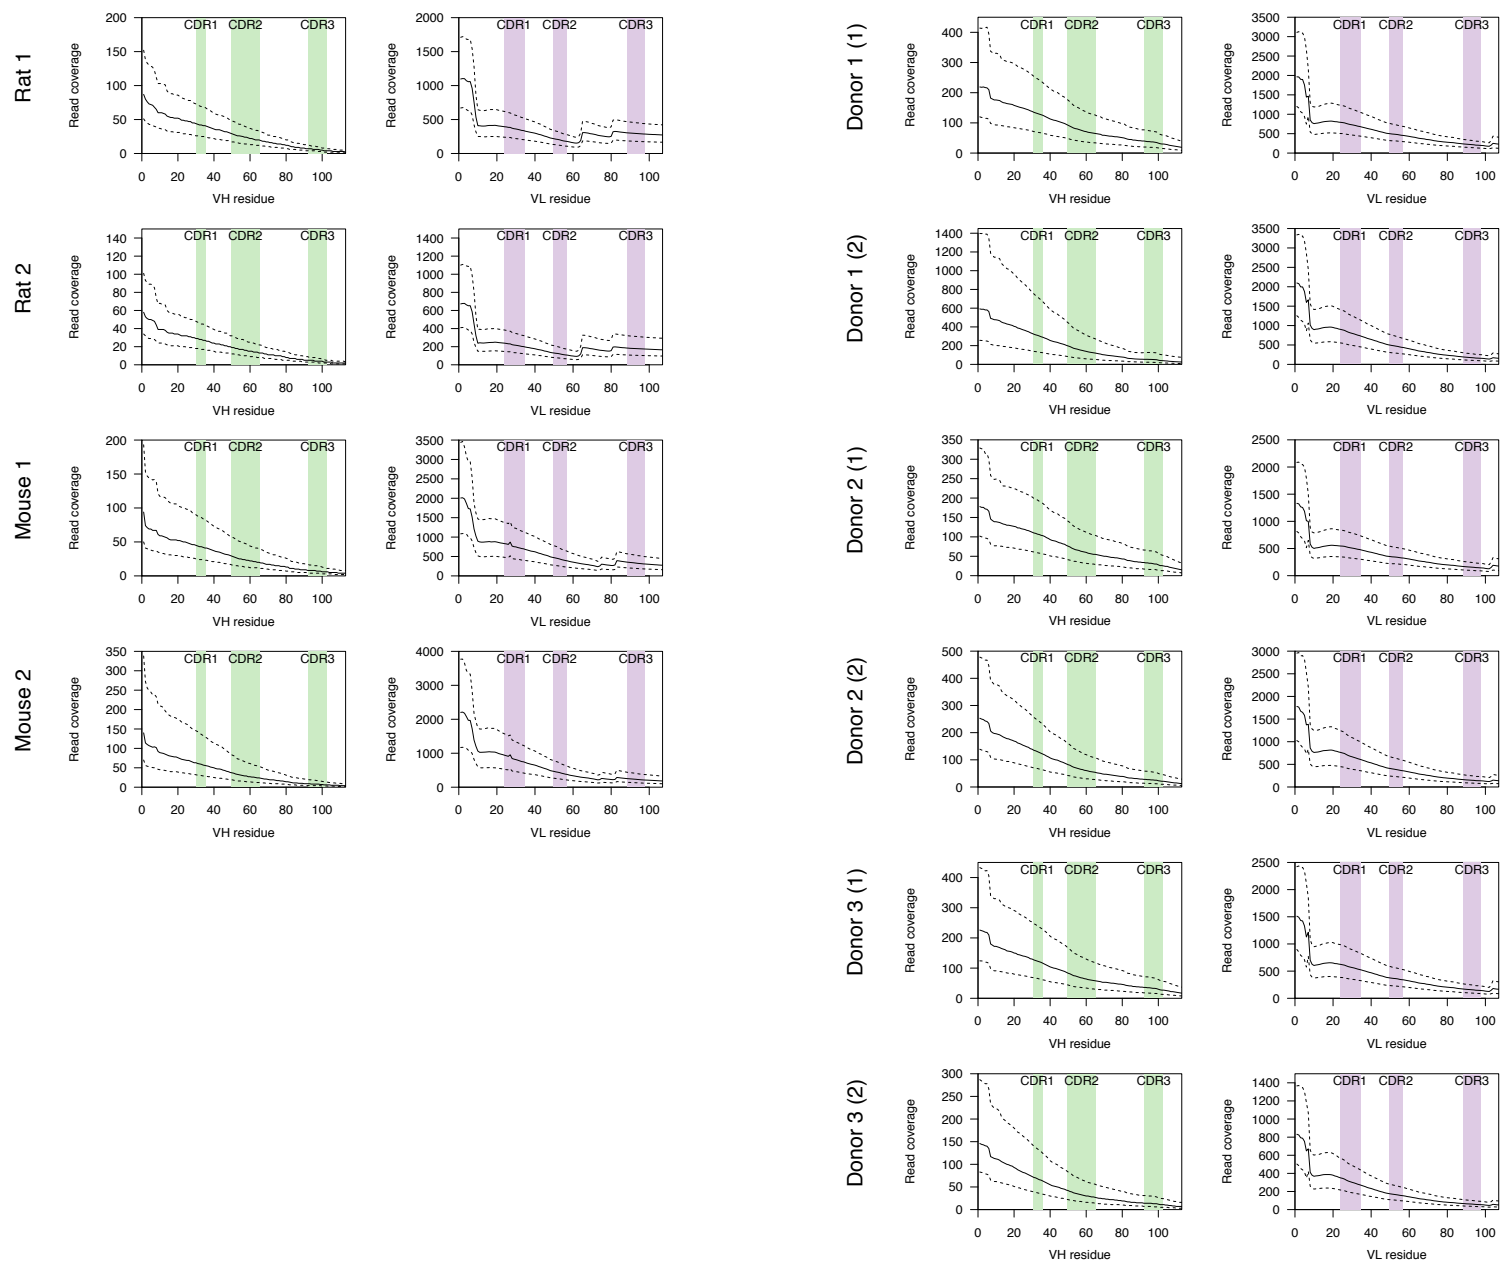

**Supplementary Figure 5.** Read coverage for quality-filtered VH and VL assemblies. Otherwise as in Figure 2c.

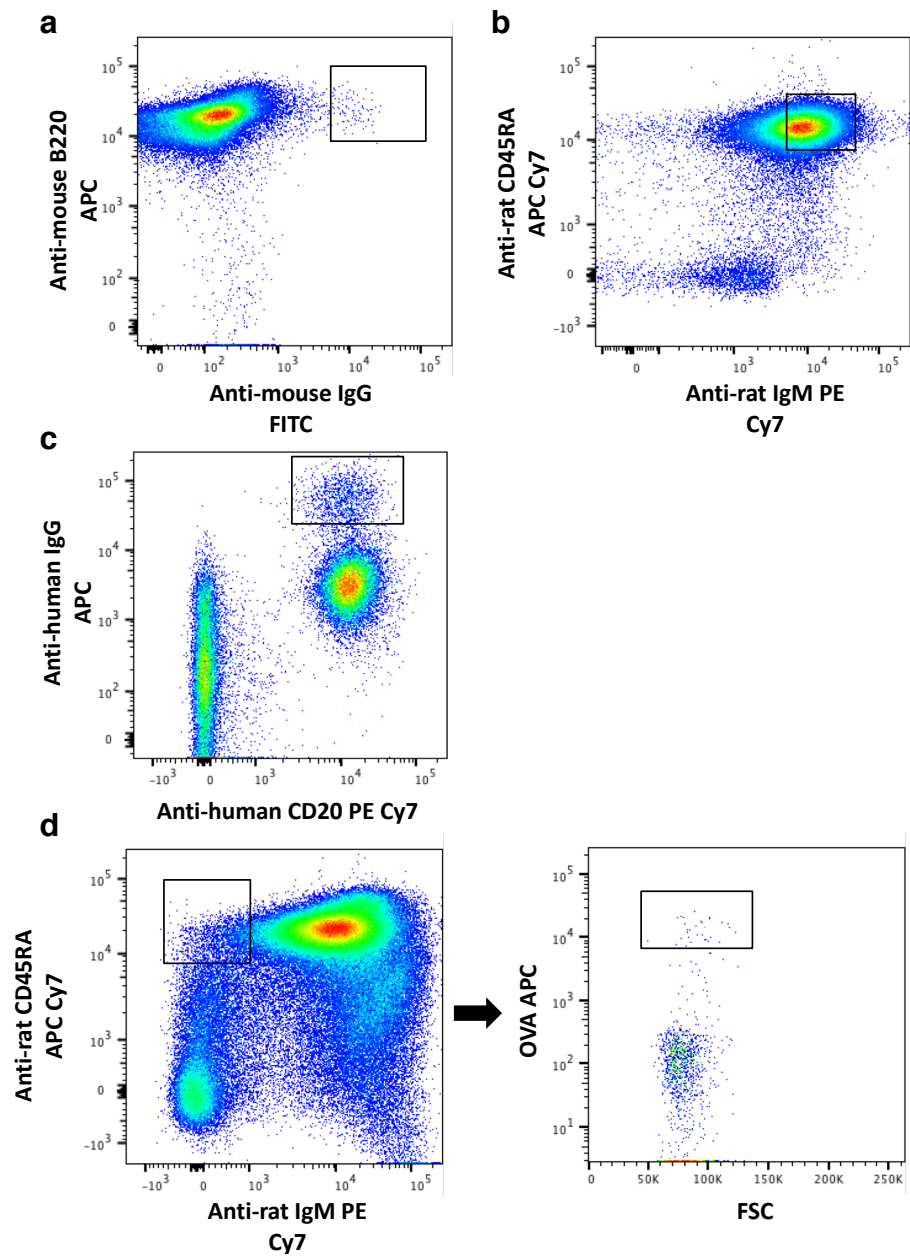

**Supplementary Figure 6.** Representative B cell sorting gates for naïve mice (a), naïve rat (b), human (c) and pooled OVA-immunized rats (d).

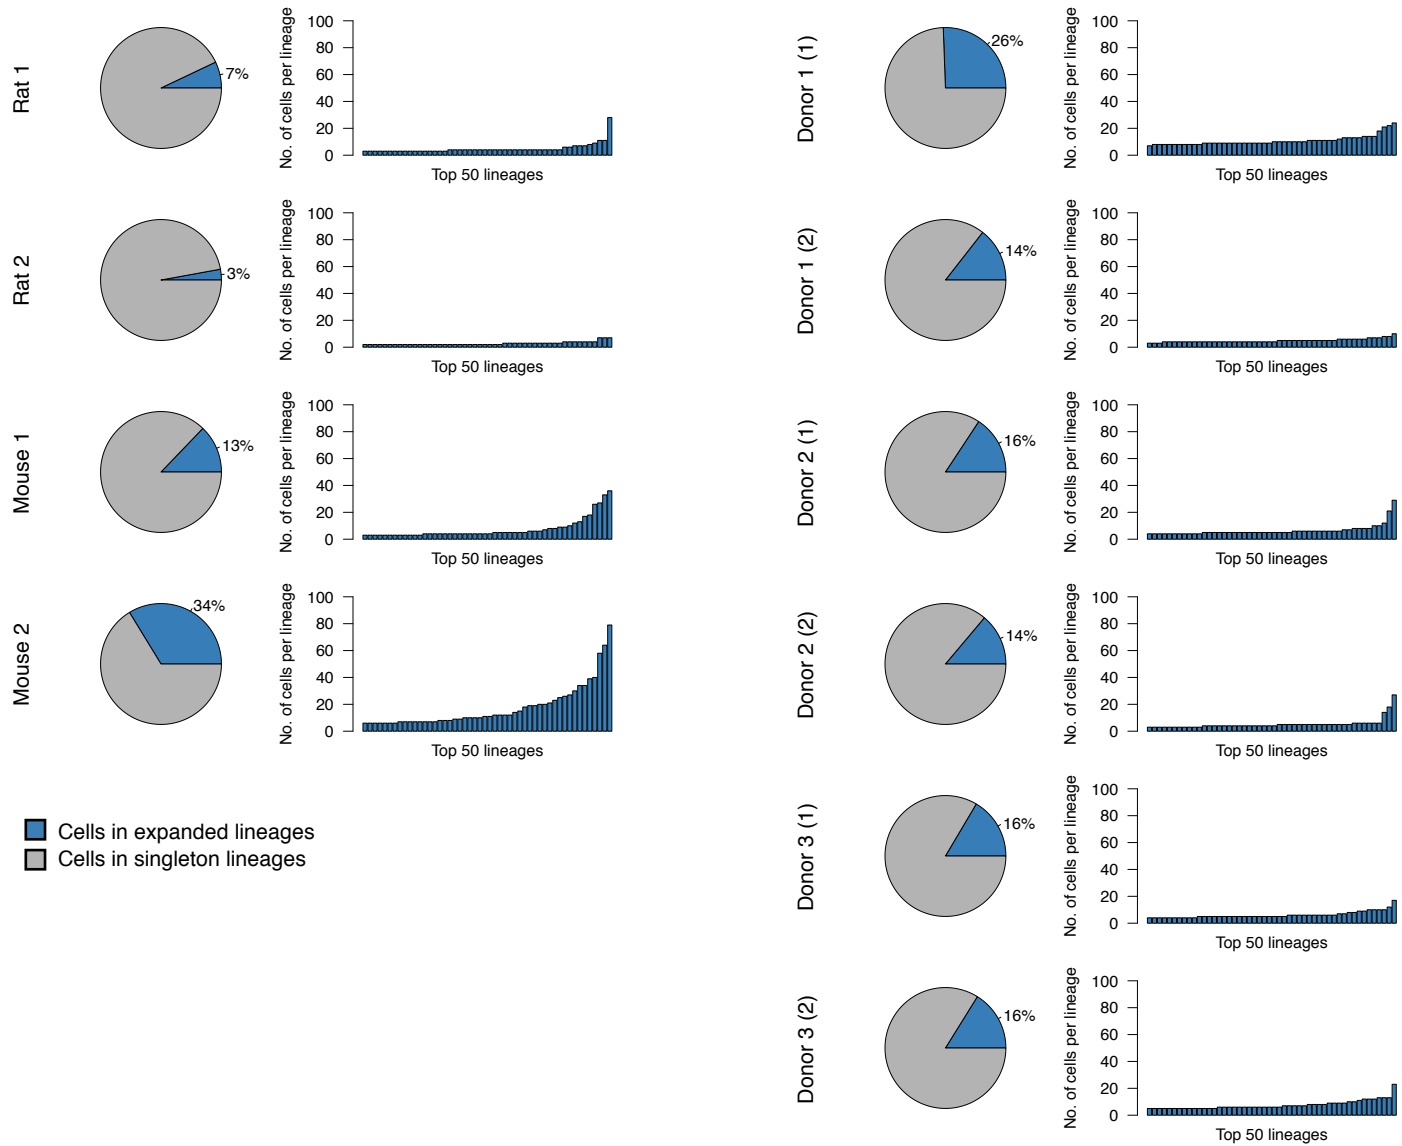

**Supplementary Figure 7.** Lineage expansions. Otherwise as in Figure 6a,b.

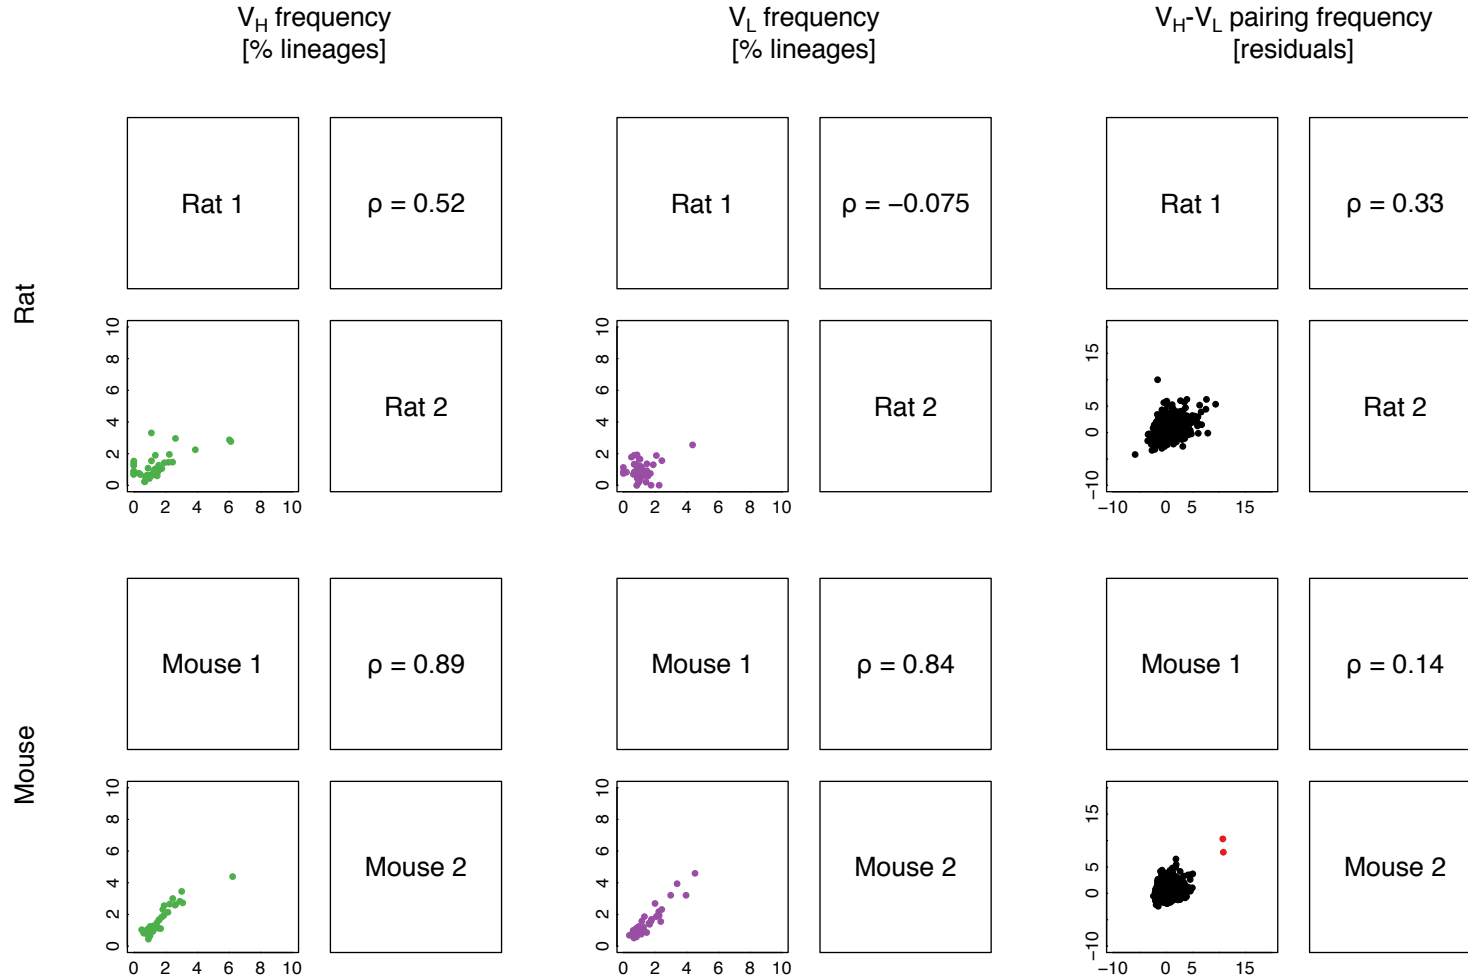

**Supplementary Figure 8.** Pairwise scatter plots for  $V_H$  frequencies,  $V_L$  frequencies, and standardized residuals for  $V_H-V_L$  pairing frequencies for two rats (top) and two mice (bottom). Frequencies are for lineages with a particular germline gene segment or pairing. *IGHV8-12:IGKV3-7* and *IGHV3-2:IGKV5-43* are highlighted in red.



$V_H$  frequency  
[% lineages]

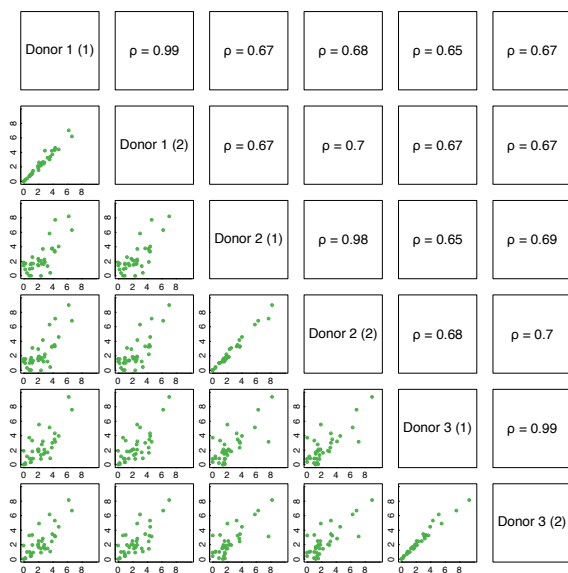

$V_L$  frequency  
[% lineages]

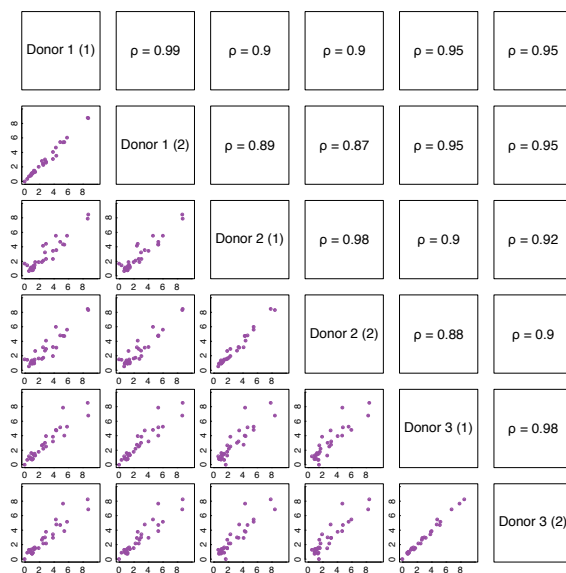

$V_H$ - $V_L$  pairing frequency  
[residuals]

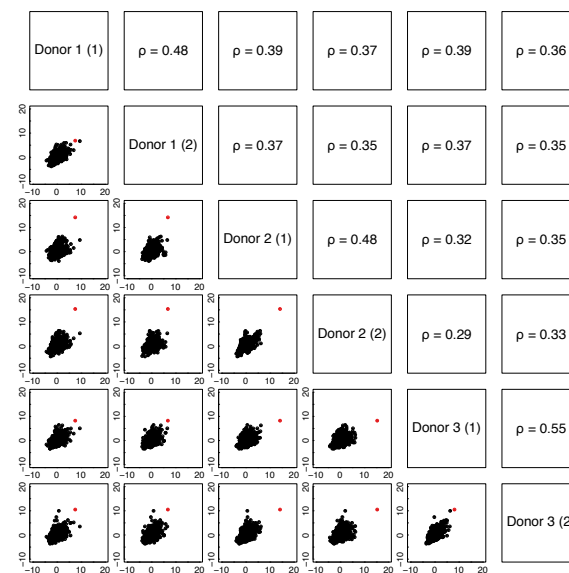

**Supplementary Figure 9.** Pairwise scatter plots for  $V_H$  frequencies,  $V_L$  frequencies, and standardized residuals for  $V_H$ - $V_L$  pairing frequencies for three human donors, each profiled at two different time points. Frequencies are for lineages with a particular germline gene segment or pairing. *IGHV3-7:IGKV2-30* is highlighted in red.

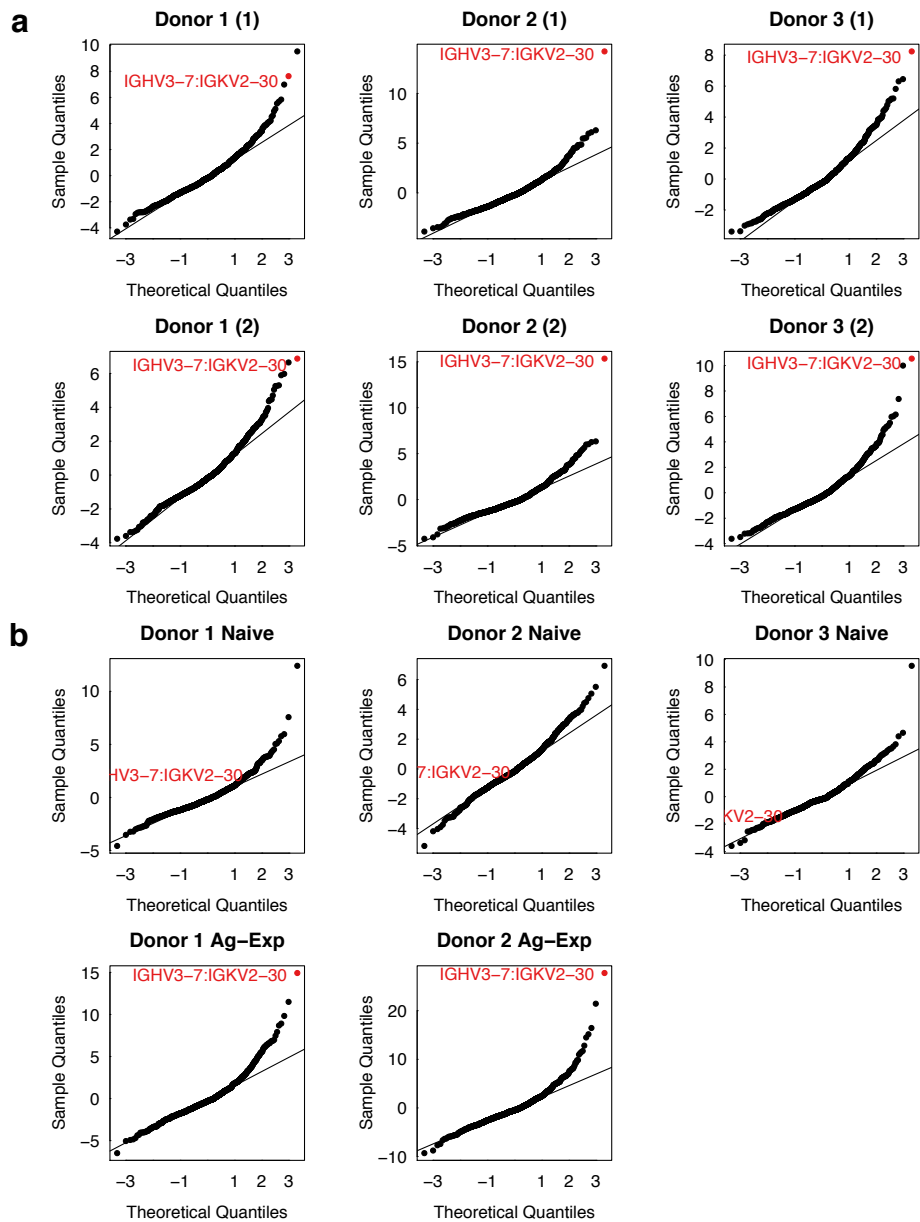

**Supplementary Figure 10.** QQ-plots of standardized residuals for  $V_H$ - $V_L$  pairing frequencies. (a) Data from three human donors, each profiled at two different time points. (b) Data for naive and antigen-experienced human B cells published in DeKosky, B.J. et al. Large-scale sequence and structural comparisons of human naive and antigen-experienced antibody repertoires. Proc Natl Acad Sci U S A 113, E2636-2645 (2016).

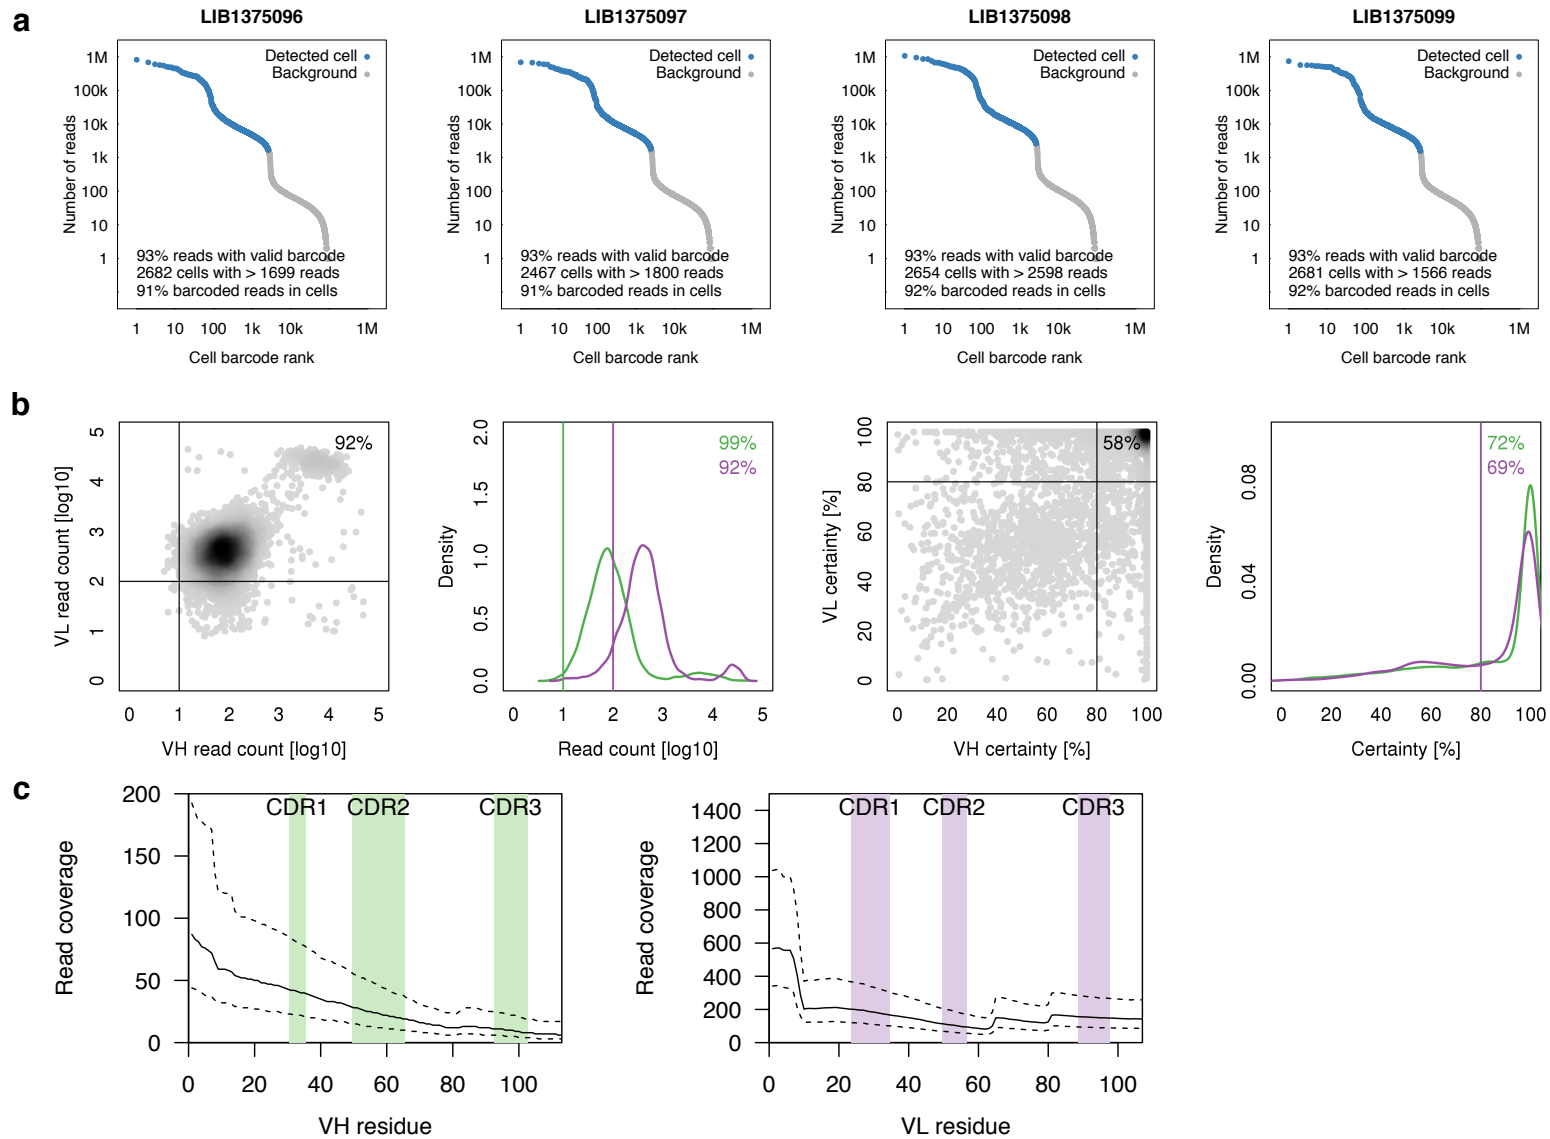

**Supplementary Figure 11.** Quality assessment of IgM<sup>neg</sup>/OVA<sup>pos</sup> lymph node B cell data. (a) Cell detection. (b) Cell quality filtering. (c) Read coverage for quality-filtered VH and VL assemblies.

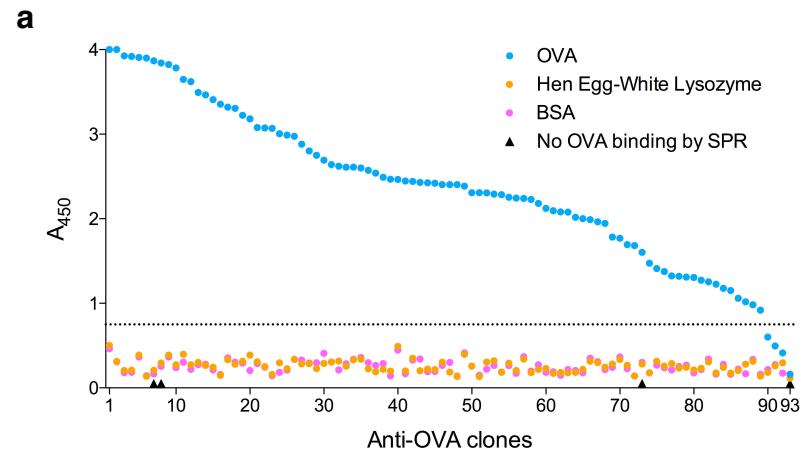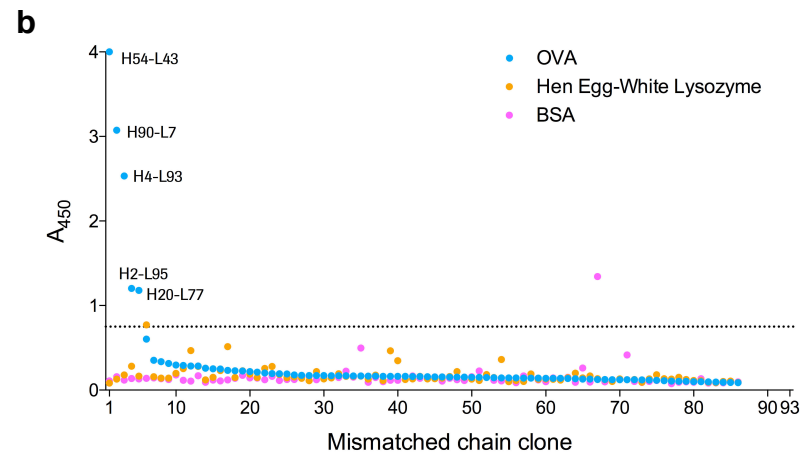

**Supplementary Figure 12.** ELISA results for predicted OVA antigen-reactive B cell clones (a) and negative controls obtained by mispairing VH and VL chains (b). Clones are ranked by OVA ELISA signal separately in (a) and (b).

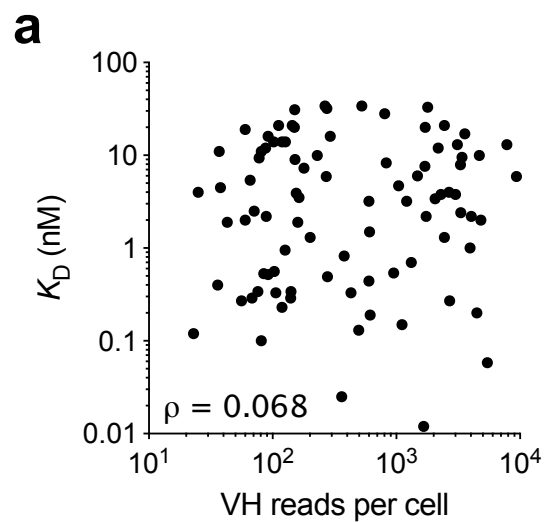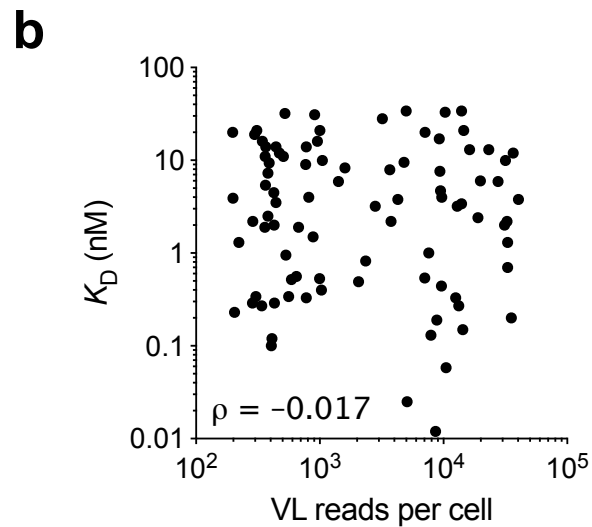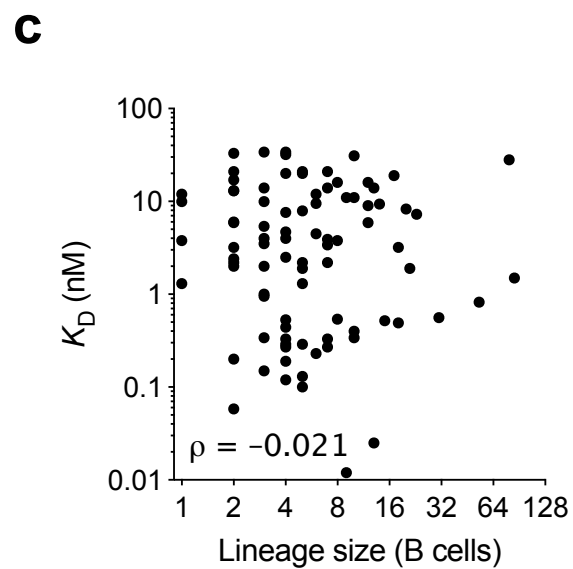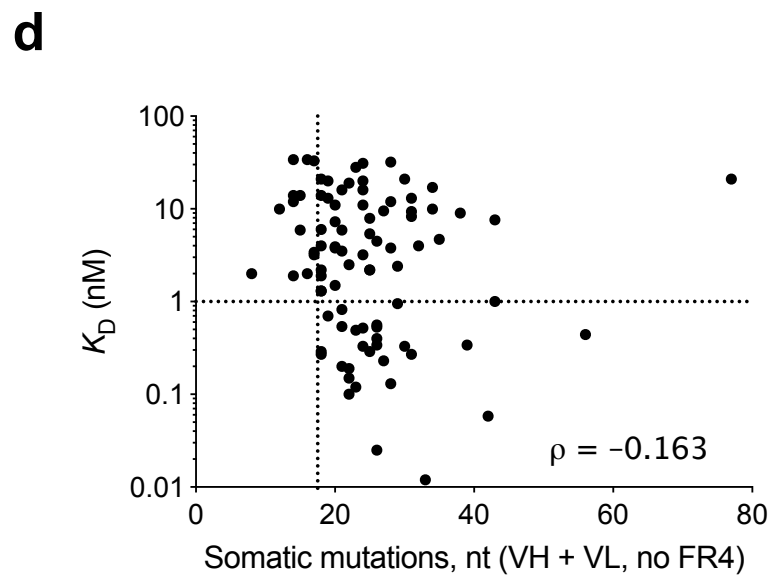

**Supplementary Figure 13.** Binding affinity ( $K_D$ ) did not show obvious associations with VH read count (a), VL read count (b), lineage size (c), or SHM load (d).

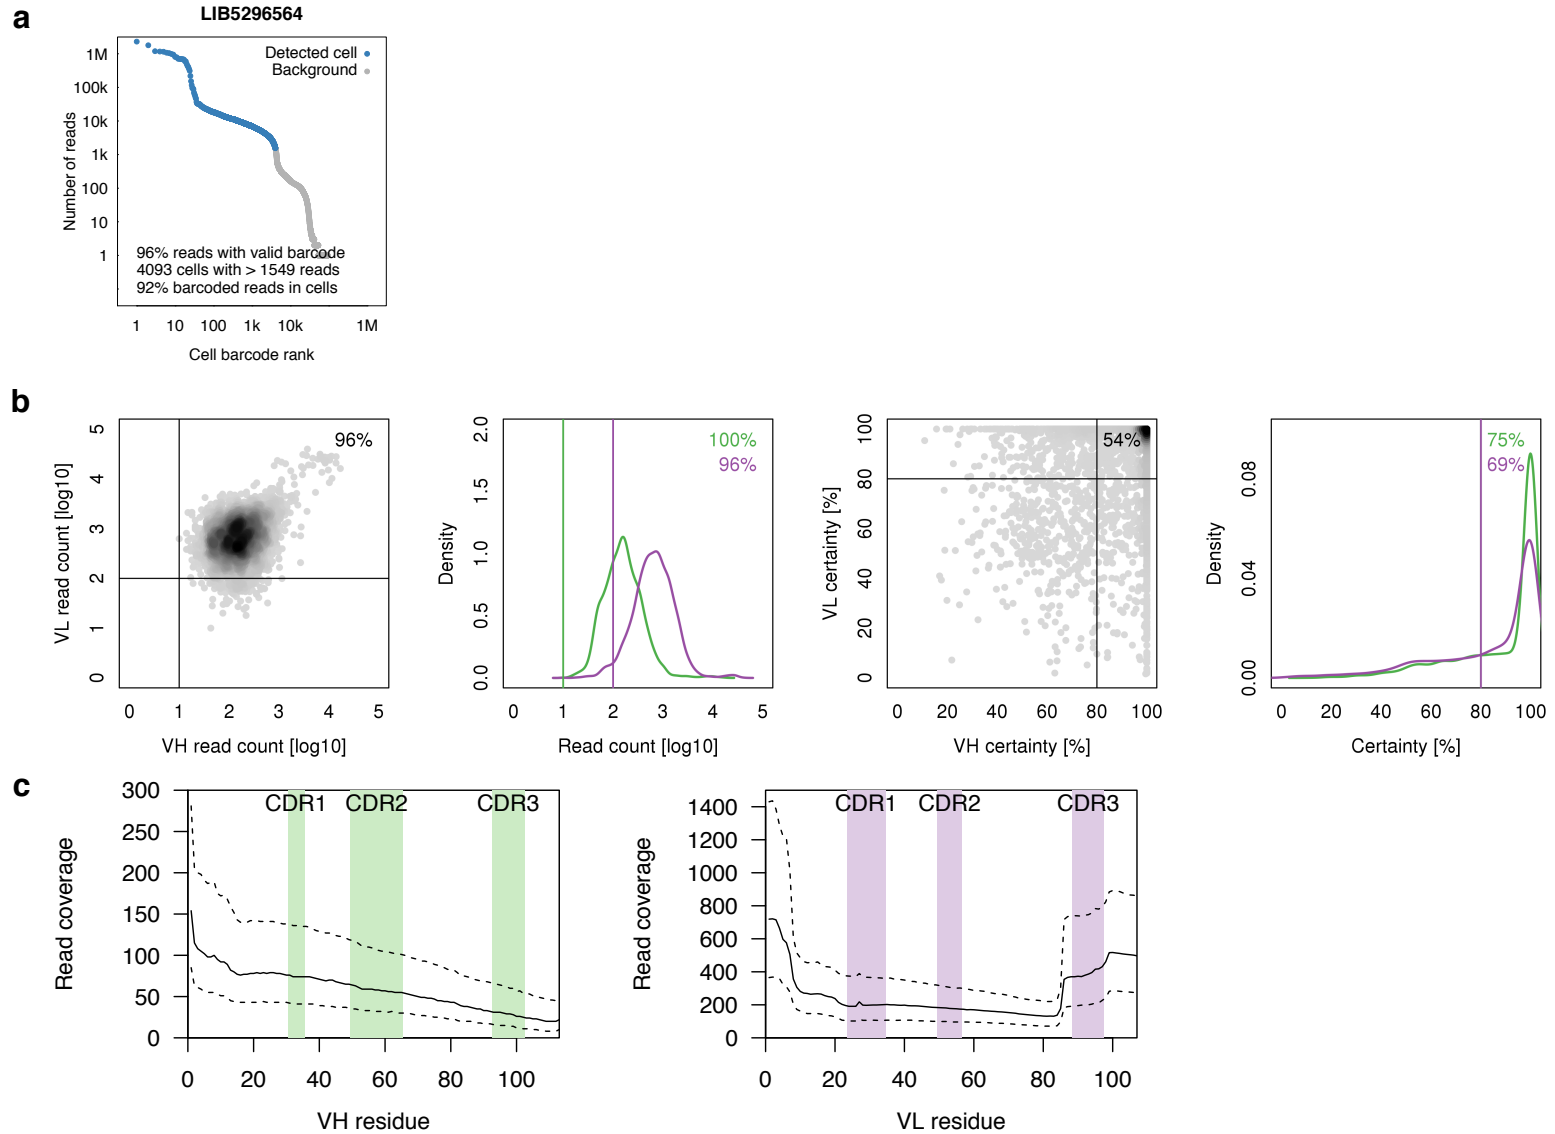

**Supplementary Figure 14.** Quality assessment of mouse data generated by 10x Genomics (B cells isolated from C57BL/6 mouse splenocytes - Direct Ig enrichment). (a) Cell detection. (b) Cell quality filtering. (c) Read coverage for quality-filtered VH and VL assemblies.

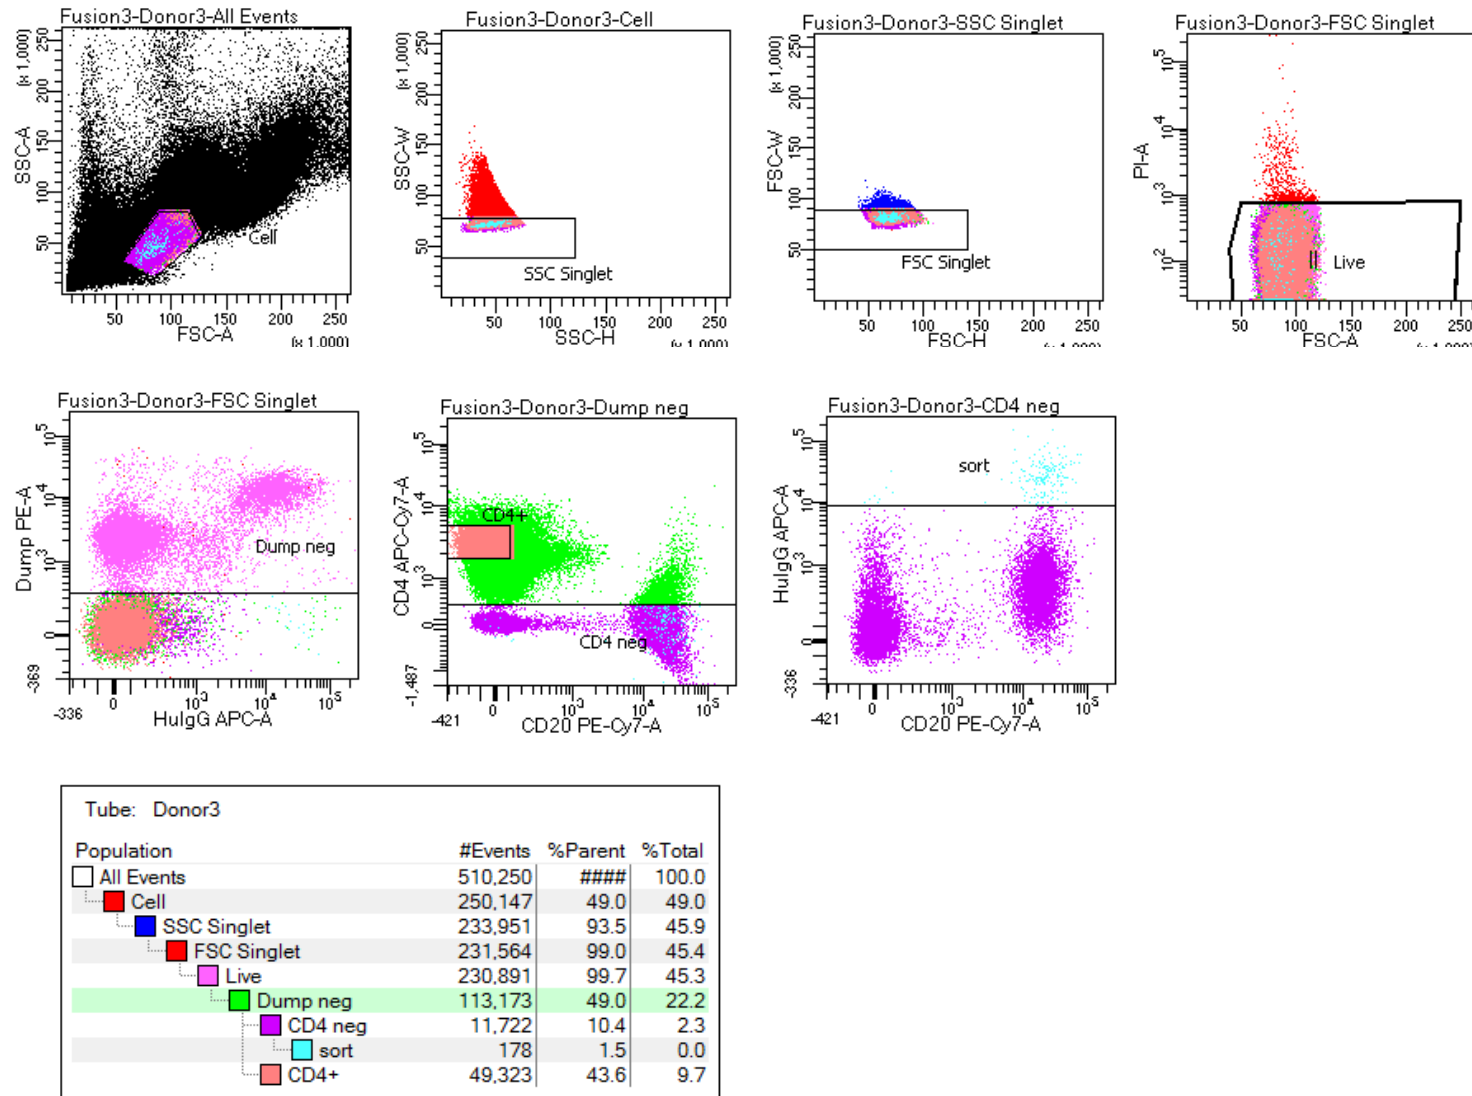

**Supplementary Figure 15.** Human IgG<sup>pos</sup> B cell sort gating strategy. 1) FSC vs SSC to gate lymphocytes, 2/3) SSC-H/SSC-W, FSC-H/FSC-W gates to exclude cell doublets, 4) FSC/PI for dead cell exclusion (PI-negative gate), 5) IgG-APC/Dump-PE (CD11b, CD11c, CD14, CD16, CD56, CD64, CD8) to exclude PE-positive non-B cells, 6) CD20-PE Cy7/CD4 APC-Cy7 to exclude CD4<sup>+</sup> cells, 7) CD20-PECy7/IgG-APC to sort for IgG<sup>pos</sup> B cells.

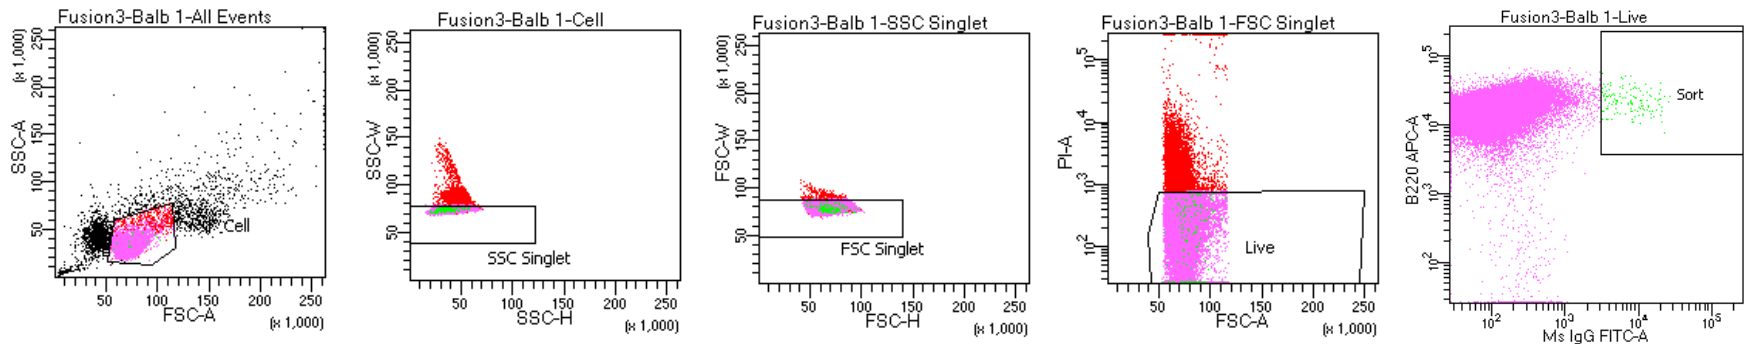

Tube: Balb 1

| Population  | #Events | %Parent | %Total |
|-------------|---------|---------|--------|
| All Events  | 100,000 | ####    | 100.0  |
| Cell        | 78,224  | 78.2    | 78.2   |
| SSC Singlet | 74,841  | 95.7    | 74.8   |
| FSC Singlet | 74,547  | 99.6    | 74.5   |
| Live        | 69,670  | 93.5    | 69.7   |
| Sort        | 141     | 0.2     | 0.1    |

**Supplementary Figure 16.** Naïve Balb/c mouse B cell sort gating strategy. 1) FSC vs SSC to gate lymphocytes, 2/3) SSC-H/SSC-W, FSC-H/FSC-W gates to exclude cell doublets, 4) FSC/PI for dead cell exclusion (PI-negative gate), 5) IgG FITC/B220-APC to sort for IgG<sup>POS</sup> B cells.



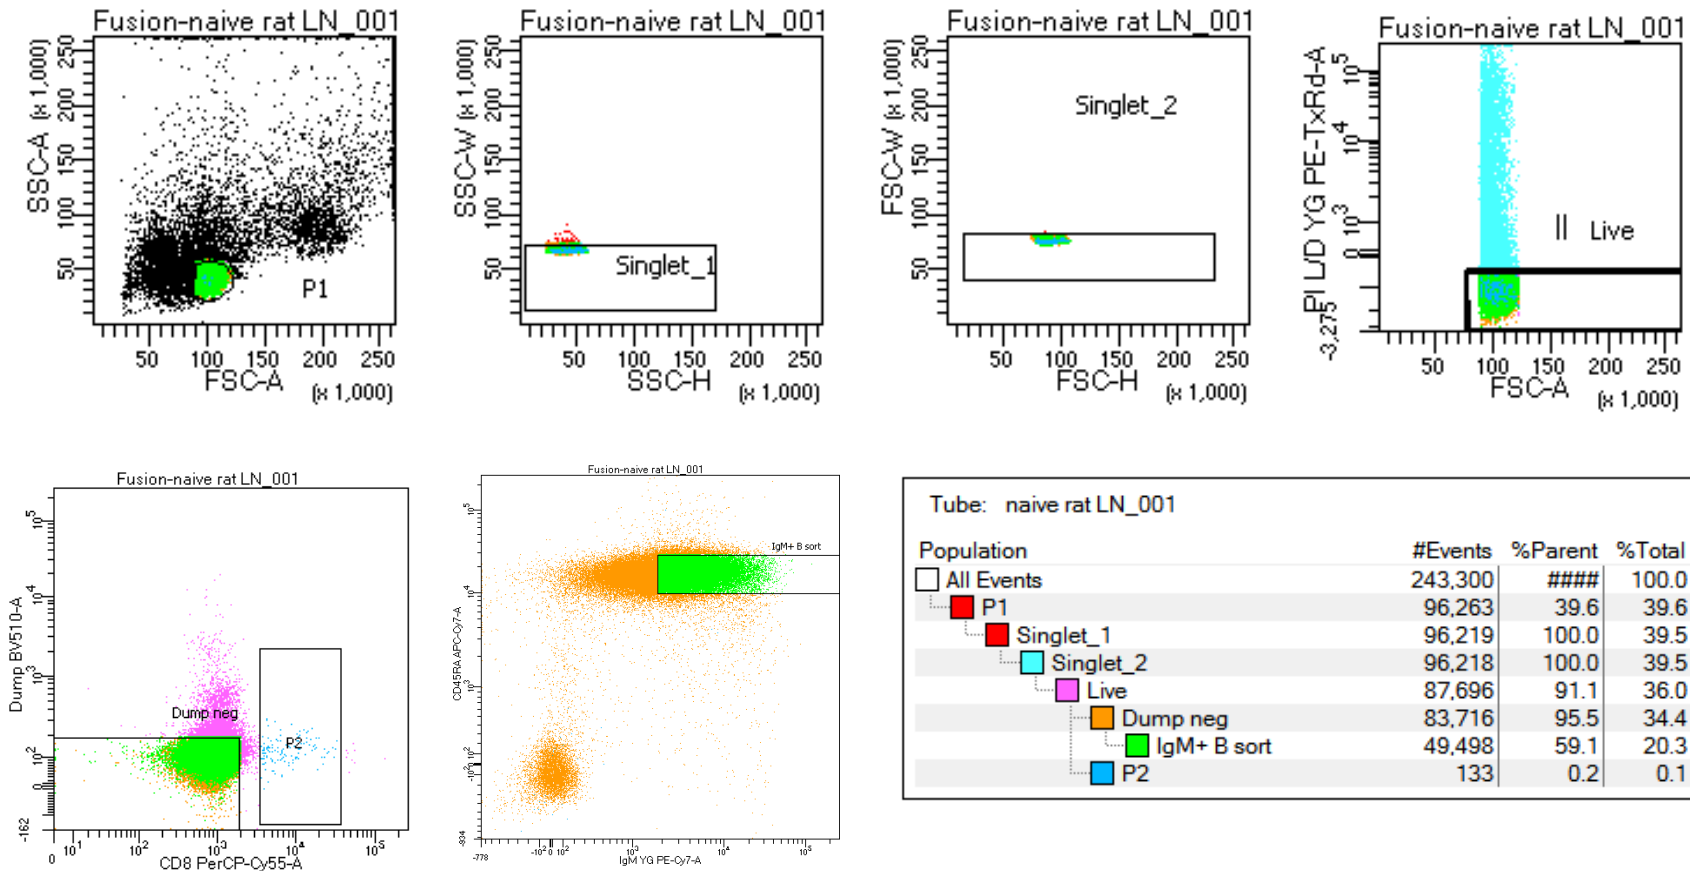

**Supplementary Figure 17.** Naïve SD rat B cell sort gating strategy. 1) FSC vs SSC to gate lymphocytes, 2/3) SSC-H/SSC-W, FSC-H/FSC-W gates to exclude cell doublets, 4) FSC/PI for dead cell exclusion (PI-negative gate), 5) CD8-PerCP Cy5.5/Dump-BV510 (CD4, CD11b, CD161a, granulocyte marker) to exclude CD8+BV510+ non-B cells, 6) IgM-PECy7/CD45RA-APC Cy7 to sort for B cells.

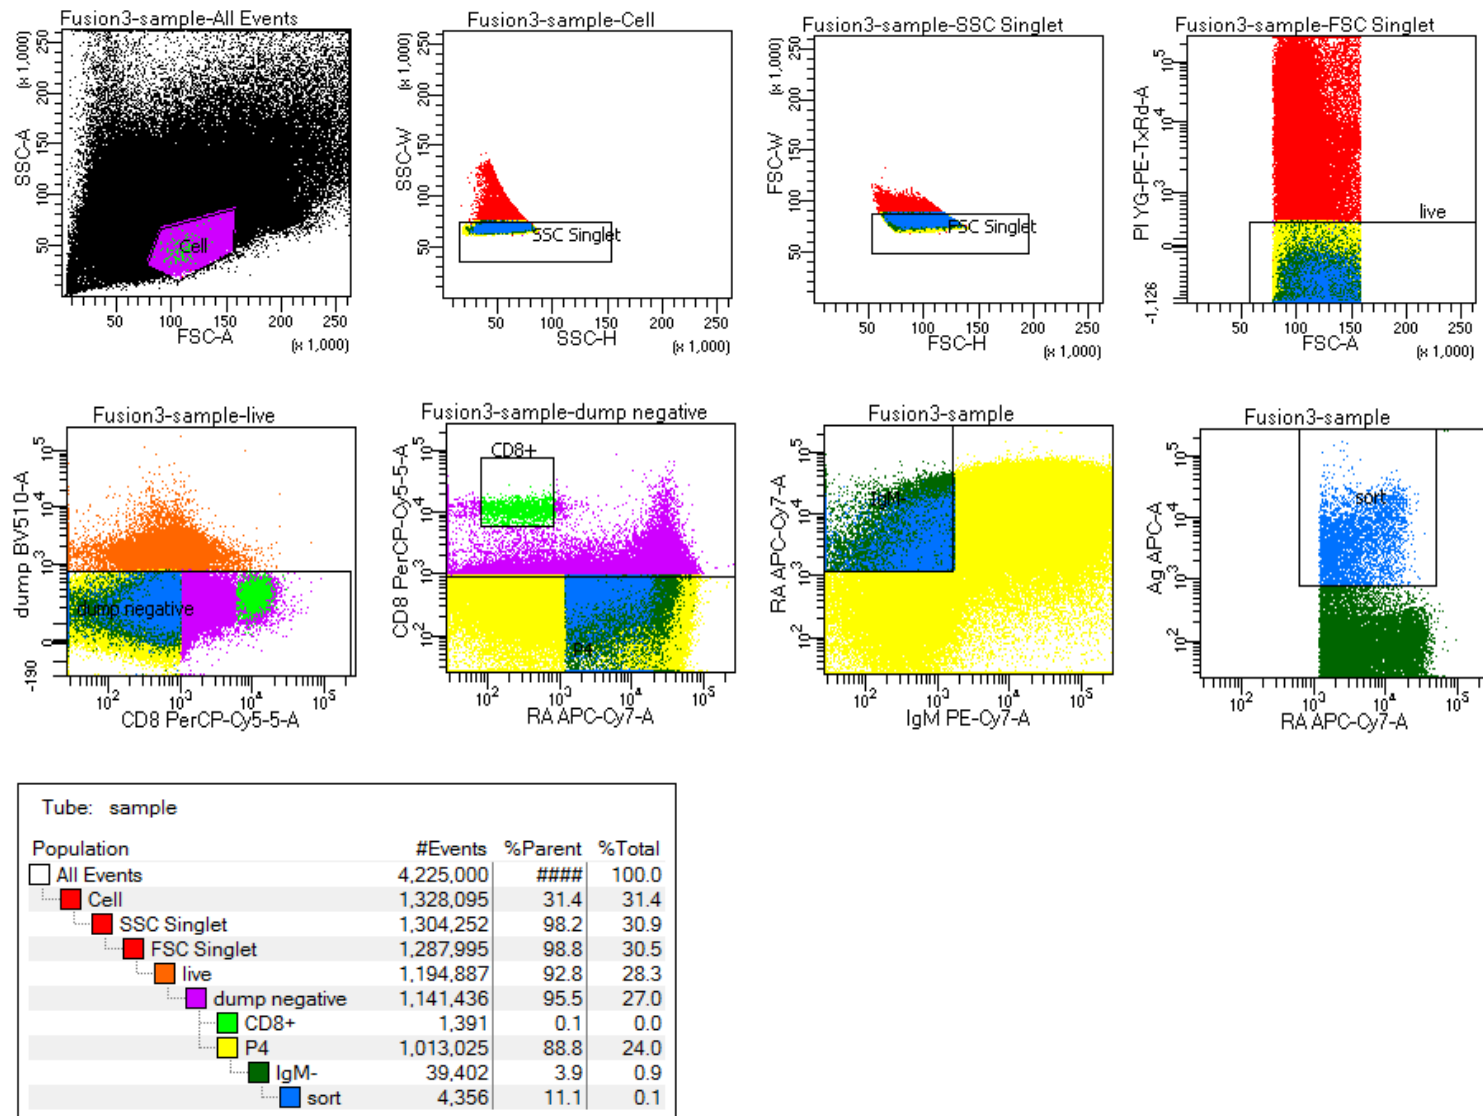

**Supplementary Figure 18.** Immunized SD rat, OVA<sup>pos</sup>IgM<sup>neg</sup> B cell sort gating strategy. 1) FSC vs SSC to gate lymphocytes, 2/3) SSC-H/SSC-W, FSC-H/FSC-W to exclude cell doublets, 4) FSC/PI for dead cell exclusion (PI-negative gate), 5) CD8-PerCP Cy5.5/Dump-BV510 (CD4, CD11b, CD161a, granulocyte marker) to exclude BV510+ non-B cells, 6) CD45R-APC Cy7/CD8-PerCP Cy5.5 to exclude CD8+ cells, 7) IgM-PE Cy7/CD45R-APC Cy7 to gate for IgM<sup>neg</sup> B cells, 8) CD45R-APC Cy7/OVA-APC to sort for OVA<sup>pos</sup>IgM<sup>neg</sup> B cells.

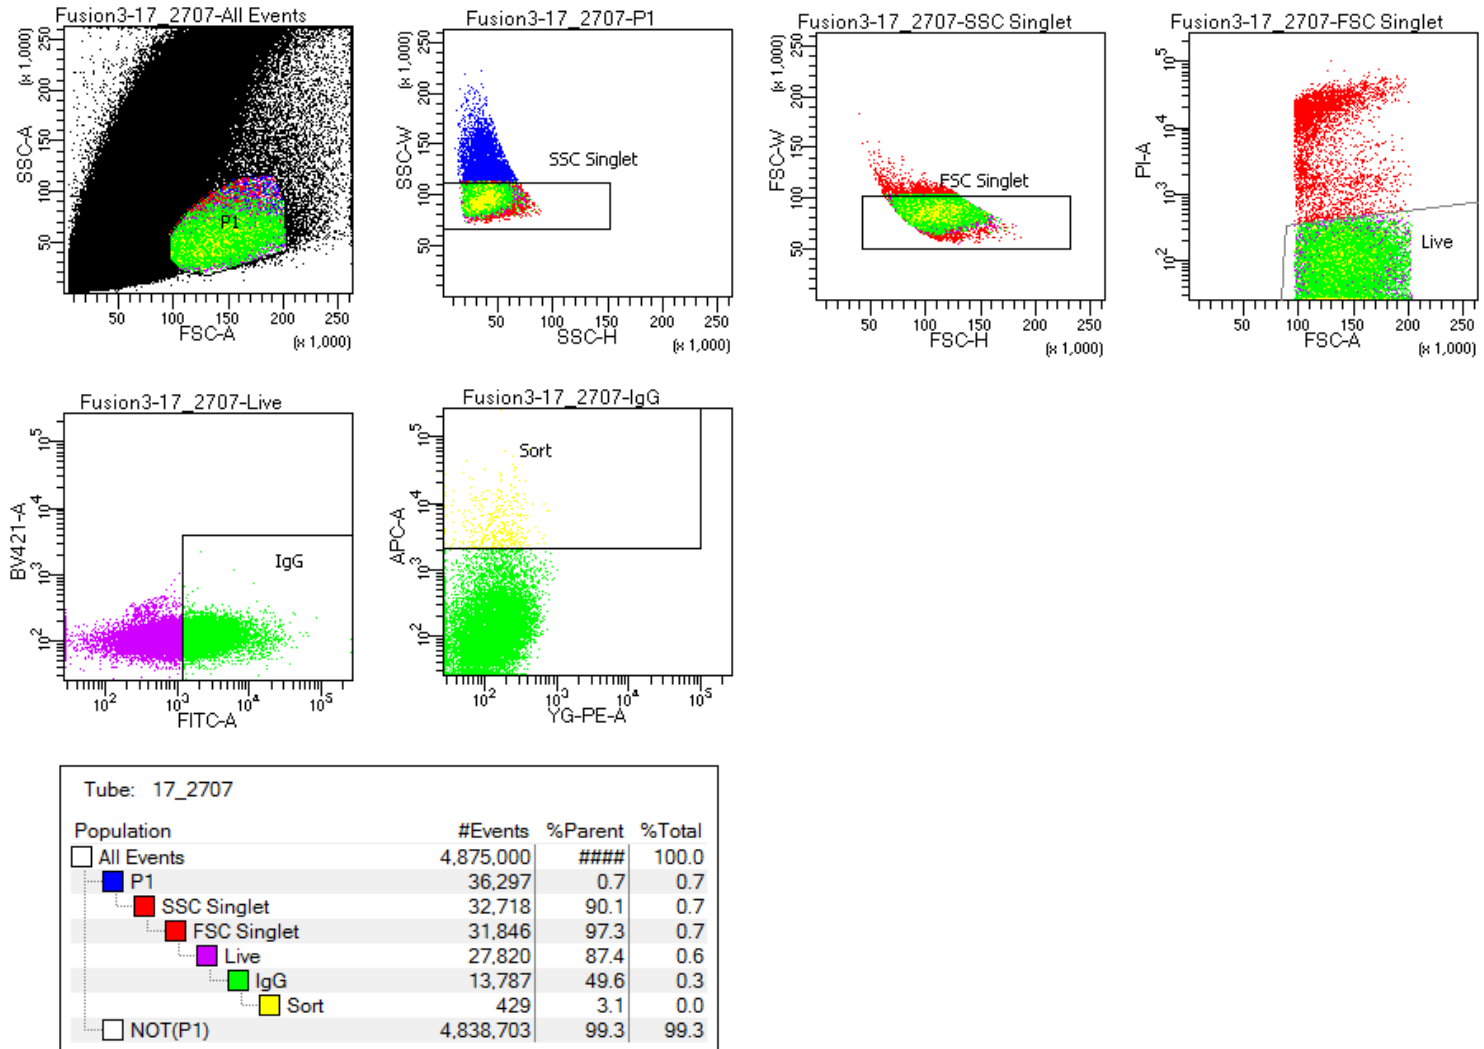

**Supplementary Figure 19.** Immunized SD rat, OVA<sup>pos</sup>IgG<sup>pos</sup> hybridoma sort gating strategy. 1) FSC vs SSC to gate hybridoma cells, 2/3) SSC-H/SSC-W, FSC-H/FSC-W gates to exclude cell doublets, 4) FSC/PI for dead cell exclusion (PI-negative gate), 5) IgG FITC/BV421 (empty channel) to gate for IgG<sup>pos</sup> hybridomas, 6) PE (empty channel)/OVA-APC to sort for OVA<sup>pos</sup>IgG<sup>pos</sup> hybridomas.

### **PCR primers (reverse strand, constant region)**

Rat CH1, outside PCR primer: YYTKGACCAGGCAKCCCAKDGTCAC

Rat CH1, inside PCR primer: CCAGGAGCCAGTGGATAGAC

Rat C $\kappa$ , outside PCR primer: AGGCACCTCCAGTTGCTAAC

Rat C $\kappa$ , inside PCR primer: CAGTTGGTGCAGCATCAGCCCG

Mouse CH1, outside PCR primer: GGGAARTAVYCCTTGACCAGGCABCC

Mouse CH1, inside PCR primer: GRCCARKGGATAGACHGATG

Mouse C $\kappa$ , outside PCR primer: GACTGAGGCACCTCCAGATG

Mouse C $\kappa$ , inside PCR primer: CTGCTCACTGGATGGTGGGAAG

### **List of additional Rat VH germlines not in IMGT database**

>rIGHV2U2 ; wgs

CAGGTGCAGCTGAAGGAGTCAGGACCTGGTCTGGTGCAGCCCTCAGAGACCCTGTCCCTCACCTGCACTGTCTCTGGGTTCTCATT  
AACCAGCAATAGTGTACTGGGTTCCGAGCCTCCAGGAAAGGGTCTGGAGTGGATGGGAATAATACGGAGTGGTGGGAAGCA  
CAGATTATAATTCAGCTCTCAAATCCCGACTGAGCATCAGCAGGGACACCTCCAAGAGCCAAGTTTTCTTAAAAATGAACAGTCTG  
CAAAGTGAAGACACAGCCATTTACTACTGTACCAGA

>rIGHV2U3 ; wgs

CAGGTGCAGCTGAAGGAGTCAGGACCTGGTCTGGTGCAGCCCTCACAGACCCTGTCCCTCACCTGCACTGTCTCTGGATTCTCATT  
AACCAGCTATCATGTAAGCTGGGTTTGCCAGCCTCCAGGAAAGGGTCTGGAGTGGATGGGAAGAATACAGAGTGGTGGGAAGCAC  
AGATTATAATTCAGCTCTCAAATCCCGACTGAGCATCAGCAGGGACACCTCCAAGAGCCAAGTTTTCTTAAAAATGAACAGTCTGC  
AAAGTGAAGACACAGCCATTTACTACTGTACCAGAGA

>rIGHV2U4 ; wgs

CAGGTGCAGCTGAAGGAGTCAGGACCTGGTCTGGTGCAGCCCTCACAGACTTTGTCTCTCACCTGCACTGTCTCTGGGTTCTCACT  
AACCAGCTATCATGTAAGCTGGGTTCCGCCAGCCTCCAGGAAAAGGTCTGGAGTGGATGGGAGTAATATGGACTGGTGGAAAGCAC  
AGCATATAATTCACCTTCTCAAATCCCGACTGAGCATCAGCAGGGACATCTCCAAGAGCCAAGTTTTCTTAAAAATGAACAGTCTGC  
AAACTGAAGACACAGCCACTTACTACTGTGCCAGAGA

>rIGHV2U5 ; wgs

CAGGTGCAGCTGAAGGAGTCAGGACCTGGTCTGGTGCAGCCCTCACAGACCCTGTCTCTCACCTGCACTGTCTCTGGGTTCTCACT  
AACCAGCTATCATGTAAGCTGGGTTCCGCCAGCCTCCAGGAAAGGGTCTGGAGTGGATGGGAGGAATATGGGGTGATGGAAGCA  
CAGCATATAATTCACCTTCTCAAATCCCGACTGAGCATCAGCAGGGACACCTCCAAGAGCCAAGTTTTCTTAAAAATGAACAGTCAG  
CAAACCTGAAGACACAGCCATTTACTTCTGTACCAGA

>rIGHV2U6 ; wgs

CAGGTGCAGCTGAAGGAGTCAGGACCTGGTCTGGTGCAGCCCTCACAGACCCTGTCCCTCACCTGCACTGTCTCTGGGTTCTCACT  
AAGCAGCTATGGTGTAAATCTGGGTTACCAGCCTCCAGGAAAGGGTCTGGAGTGGATGGGAGGAATATGGGGTGATGGAAGCA  
CAGATTATAATTCAGCTCTCAAATCCCGACTGAGCATCAGCAGGGACACCTCCAAGAGTCAAGTTTTCTTAAAAATGAACAGTCTG  
CAAACCTGAAGACACAGCCATTTACTTCTGTACCAGA

>rIGHV2U8 ; wgs

CAGGTGCAGCTGAAGGAGTCAGGATCTGGTCTGGTGCAGCCCTCACAGACCCTGTCCCTCACCTGCACTGTCTCTGGGTTCTCACT  
AACCAGCTATGGTGTAAAGCTGGGTTCCGCCAGCCTCCAGAAAAGGGTCCGGGAGTGGATTGGAGCAATATGGACTGGTGGAAAGCAC  
AGATTATAATTCAGCTCTCAAATCCCGACTGAGCATCAGCAGGGACACCTCCAAGAGCCAAGTTCTTAAAAATGAACAGTCTGC  
AAACTGAAGACACAGCCATGTACTTCTGTGCCAGAAA

>rIGHV2U9 ; wgs

CAGGTACAACCTGAAGGAGACAGGACCTGACCTAGTGCAACTGACACAGACCCTGTCCATCACATGCACTGTCTCTGGGTTCTCATT  
AACCACCTATAATGTTCACTGGGTCCGTGAGCCTCCAGGAAAGGGTCTGGAGTGGATGGGAGCAATGTGGAATGGTGGAGGCAC  
AGATTATAATTCAGCATTAAATCCCGACTGAGTATCAGCAGGGACACCTCCAAGAGCCAAGTTTTCTTAAAAATGAACAGTTTGC  
AAACTGATGACACAGCCAAGTACTTCTGTGCCAGAA

>rIGHV2U12 ; wgs

CAGGTGCAGCTGAAGGAGTCAGGACCTGGTCTGGTGCAGCCCTCAGAGACCCTGTCCCTCACCTGCACTGTCTCTGGGTTCTCACT  
AACCAGCTATAGTGTAAGTTGGGTTCCGACGCCTCAGGAAAGGGTCTGAGTGGATGGGAAGAATGTGGTATGATGGAGACAC  
AGCATATAATTCAGCTCTCAAATCCCGACTGAGCATCAGCAGGGACACCTCCAAGAACCAAGTTTTCTTAAAAATGAACAGTCTGC  
AAACTGATGACACAGGCACTTACTACTGTACCAGAGA

>rIGHV2U14 ; wgs

CAGGTGCAGCTGAAGGAGTCAGGACCTGGCCTGGTGAAGCCCTCAGAGACCCTGTCTCTCACCTGCACTGTCTCTGGGTTCTCATT  
AACCAGCTATCATGTAAGCTGGGTTCCGACAGCCTCCAGGAAAGGGTCTGGAGTGGATGGGAGTAATATGGGGTGATGGAAGCAC  
AGCATATAATTCAGCTCTCAAATCCCGACTGAGCATCAGCAGGGACACCTCCAAGAGCCAAGTTTTCTTAAAAATGAGCAGTCTGA  
AAACTGAAGACACAGCCACTTACTACTGTGCCAGAGA

>rIGHV2U16 ; wgs

CAGGTGCAGCTGAAGGAGTCAGGACCTGGTCTGGTGCAGCCCTCACAGACCCTGTCCCTCACCTGCACTGTCTCTGGGTTCTCACT  
AACCAGCTATGGTGTAAGCTGGGTTCCGACGCCTCCAGGAAAGGGTCTGGAGTGGATGGGAGGAATATGGGGTGATGGAAGCA  
CAAATTATAATTCAGCTCTCAAATCCCGACTGAGCATCAGCAGGGACACCTCCAAGAGCCAAGTTTTCTTAAAAATGAACAGTCTG  
CAAAGTGAAGACACAGCCATTTACTTCTGTACCAGAGA

>rIGHV5U21 ; wgs

GAGGTGCAGCTGGTGGAGTCTGGGGGAGGCTTAGTGACGCCTGGAAGGTCCATGAAACTCTCCTGTGCAGCCTCAGGATTCCT  
TTCAGTAACTATGACATGGCCTGGGTCCGACGCCTCCAAAGAAGGGTCTGGAGTGGGTGCGCAACCATTAGTTATGATGGTAGTA

GCACTTACTATCGAGACTCCGTGAAGGGCCGATTCACTATCTCCAGAGATAATGCAAAAAGCACCCCTATACCTGCAAATGGACAGT  
CTGAGGTCTGAGGACACGGCCACTTATTACTGTACAACAGA

>rIGHV5U22 ; wgs

GAGGTGCAGCTGGTGGAGTCTGGGGGAGGCTTAGTGAGCCTGGAAGGTCCATGAAACTCTCCTGTGCAGCCTCTGGATTCACTT  
TCAGTAGCTTTGCAATGGCCTGGGTCCGCCAGGCTCCAACGAAGGGGCTGGAGTGGGTTCGCATCCATTAGTTATGATGGTGGTAA  
CACTTACTATCGAGACTCCGTGAAGGGCCGATTCACTATCTCCAGAGATAATGCAAAAAGCACCCCTATACCTGCAAATGGACAGTC  
TGAGGTCTGAGGACACGTCCACTTATTACTGTGCAAAGACA

>rIGHV5U23 ; wgs

GAGGTGCAGCTGGTGGAGTCTGGGGGCGGCTTAGTGAGCCTGGAAGGTCCATGAAACTCTCCTGTGCAGCCTCAGGATTCACT  
TTCAGTAACTATGGCATGGCCTGGGTCCGCCAGGCTCCAAAGAAGGGTCTGGAGTGGGTTCGCATACATTAGTTATGATGGTGGTA  
GCACTTACTATCGAGACCCCGTGAAGGGCCGATTCACTATCTCCAGAGATAATGCAAAAAGCACCCCTATACCTGCAAATGGACAG  
TCTGAGGTCTGAGGACACGGCCACTTATTACTGTACAACAGA

>rIGHV5U25 ; wgs

GAGGTGCAGCTGGTGGAGTCTGGGGGAGGATTAGTGAGCCTGGAAGGTCCCTGAAACTCTCCTGCGCAGCCTCAGGATTCACT  
TTCAGTAGCTTTCCAATGGCCTGGGTCCGCCAGGCTCCAAAGAAGGGTCTGGAGTGGGTTCGCATCCATTAGTTCTGGTGGTGGTG  
GCACTTACTATCCAGATCCGTGAAGGGCAGATTTACTATCTCCAGAGATAATGCAAAAAGCACCCCTATACCTGCAAATGGACAGT  
CTGAGATCTGAGGACACGGCCAGTTACTATTGTGCAAGACA

>rIGHV2U17d ; repertoire NGS

CAGGTGCAGCTGAAGGAGTCAGGACCTGGTCTGGTGCAGCCCTCACAGACCCTGTCCCTCACCTGCACTGTCTCTGGGTTCCTATT  
AACCAGCAATAGTGACTACTGGGTTCGCCAGCCTCCAGGAAAGGGTCTGGAGTGGGTGGAGCAATATGGAGTGGTGGGAAGCAC  
AGATTATAATTCAGCTCTCAAATCCCGACTGAGCATCAGCAGGGACACCTCCAAGAGCCAAGTTTTCTTAAAAATGAACAGTCTGC  
AAACTGAAGACACAGCCATTTACTTCTGTACCAGA

>rIGHV2U18d ; repertoire NGS

CAGGTGCAGCTGAAGGAGTCAGGACCTGGTCTGGTGCAGCCCTCACGGACCCTGTCCCTCACCTGCACTGTCTCTGGGTTCTCGT  
CACCAGCTATGGTGTAAAGCTGGGTTCCGCCAGCCTCCAGGAAAGGGTCTGGAGTGGATTGCAGCAATATGGAGTGGTGGAAAGTAC  
AGATTATAATTCAGCTCTCAAATCCCGACTAAGCATCAGCAGGGACACCTCCAAGAGCCAAGTTCTCTTAAAAATGAACAGTCTGC  
AAACTGAAGACACAGCCATGTACTTCTGTGCCAGA

>rIGHV3U1d ; repertoire NGS

GAGGTGCAGCTTCAGGAGTCAGGACCTGGCCTTGTGAAACCCTCACAGTCACTCTCCCTCACCTGTTCTGTCACTGGTTACTCCATC  
ACTAGTAATTACTGGGGCTGGATCCGGAAGTTCCAGGAAATAAAATGGAGTGGATGGGATACATAAGCTACAGTGGTAGCACT  
AGCTACAACCCATCTCTCAAAGTCGAATCTCCATTACTAGAGACACATCGAAGAATCAGTTCTTCTGCAGTTGAACTCTGTA  
ACTGAGGACACAGCCACATATTACTGTGCAAGA

>rIGHV3U2d ; repertoire NGS

GAGATACAGCTGCAGGAGTCAGGACCTGGCCTTGTGAAACCTCACAGTCACTCTCCCTCACCTGTTCTGTCACTGGTTACACCATT  
ACCAGTGGTTATGATTGGAGCTGGATCCGGAAGTTCCAGGAAATAAAATGGAGTGGATGGGATACATAAGCTACAGTGGTAGC  
ACTAACTACAACCCATCGCTCAAAGTCGAATCTCCATTACTAGAGACACATCCAAGAATCAGTTCTTCTGCAGTTGAACTCTGTA  
ACTACTGAGGATACAGCCACATATTACTGTGCAAGA

>rIGHV5U27d ; repertoire NGS

GAGGTGCAGCTGGTGGAGTCTGGCGGAGGCTTAGTACAGCCTGGAAGGTCCCTGAAACTCTCCTGTGCAGCCTCAGGATTCCTT  
TCAGTAACTATTACATGGCCTGGGTCCGCCAGGCTCCAACGAAGGGTCTGGAGTGGGTTCGCATCCATTACTAATAGTGGTGGTAG  
TACTTACTATCGAGACTCCGTGAAGGGCCGATTCACTATCTCCAGAGATAATGCAAAAAGCACCCCTATACCTGCAAATGGACAGTC  
TGAGGTCTGAGGACACGGCCACTTATTACTGTACAAGA

>rIGHV5U28d ; repertoire NGS

GAGGTGCAGCTGGTGGAGTCTGGGGGCGGCTTGGTGCAGCCTGGAAGGTCCCTGAAACTCTCCTGTGCAGCCTCAGGATTCCT  
TTCAGTAACTATGACATGGCCTGGGTCCGCCAGGCTCCAACGAAGGGTCTGGAGTGGGTTCGCATCCATTAGTCCTAGTGGTGGTA



GCACTTACTATCGAGACTCCGTGAAGGGCCGATTCACTATCTCCAGAGATAATGCAAAAAGCACCCCTATACCTGCAAATGGACAGT  
CTGAGATCTGAGGACACCGCCACTTATTACTGTGCAACG

>rIGHV5U29d ; repertoire NGS

GAGGTGCAGCTGGTGGAGTCTGGGGGAGGCTTAGTGCAGCCTGGAAGGTCCCTGAAACTCTCCTGTGCAGCCTCAGGATTCACT  
TTCAGTGACTATAACATGGCCTGGGTCCGCCAGGCTCCAACGAAGGGTCTGGAGTGGGTTCATCCATTAGTTATGGTGGTAGTA  
ACACCCACTATGGAGACTCCGTGAAGGGCCGATTCACTATCTCCAGAGATAATGCAAAAAGCACCCCTATACCTGCAAATGGACAG  
TCTGAGGTCTGAGGACACGGCCACTTATTACTGTGCAAGA

>rIGHV5U30d ; repertoire NGS

GAGGTGCAGCTGGTGGAGTCTGGGGGAGGCTTAGTGCAGCCTGGAAGGTCCCTGAAACTCTCCTGTGCAGCCTCAGGATTCACT  
TTCAGTAACTATTACATGGCCTGGGTCCGCCAGGCTCAAAGAAGGGTCTGGAGTGGGTTCGCAACCATTAGTACCAGTGGTAGCA  
GAACTTACTATCCAGACTCCGTGAAAGGCCGATTCACTATCTCCAGAGATAATGCAAAAAGCAGCCTATACCTGCAAATGAACAGT  
CTGAAGTCTGAGGACACGGCCACTTATTACTGTGCAAGA

>rIGHV5U31d ; repertoire NGS

GAGGTGCAGCTGGTGGAGTCTGGGGGAGGCTTAGTGCAGCCTGGAAGGTCCATGAAACTCTCCTGTGCAGCCTCAGGATTCACT  
TTCAATAACTATGACATGGCCTGGGTCTGCCAGGCTCAAAGAAGGGTCTGGAGTGGGTTCGCAACCATTAGTTATGATGGTAGTA  
GCACTTACTATCGAGACTCCGTGAAGGGCCGATTCACTATCTCCAGAGATAATGCAAAAAGCACCCCTATACCTGCAAATGGACAGT  
CTGAGGTCTGAGGACACGGCCACTTATTACTGTGCAAGA

### **List of additional Rat Vk germlines not in IMGT database**

>rIGKV1U5 ; wgs

GATGTTGTGATGACCCAGACACCACCATCTTTGTCGTTGCCATTGGACAGTCAGTCTCCATCTCTTGCAAGTCAAGTCAAAGCCTC  
GTAGCTAGTGATAAAAATACATATTTGAATTGGTTATTACAGAGTCCTGGCCGGTCTCCGAAGCGCCTAATCTATCAGGTGTCTAA

GCTGGACTCTGGAGTCCCTGACAGGTTCA GTGGCAGTGGATCAGAGAAAGATTTCACTTAAAATCAGCAGAGTGGAGGCTGA  
GGATTTGGGAGTTTATTACTGCCTGCAAGGTACACATCTTCTCA

>rIGKV1U10 ; wgs

GATGTTGTGTTGACACAACTCCAGTTGCCAGCCTGTCACTTGGAGATCAAGCTTCTATATCTTGCAGGTCTAGTCAGAGCCT  
GGTACATAGTAATGGAAACTTATTTGGAATGGTACCTACAGAAGCCAGGCCAGTCTCCACAGCTCCTCATCTATAAGGTTTCCA  
ACCGATTTTCTGGGGTACCAGACAGGTTCA TTGGCAGTGGGTGAGGGTCAGATTTACCCTCAAGATCAGCAGAGTAGAGCCTGA  
GGACTTGGGAGTTTATTACTGCTTCCAAGCTACACATGATCCTCC

>rIGKV1U75 ; wgs

GATGTTGTGTTGACACAACTCCAGGTTCCCTGTCTGTCACTTGGAGATCAAGCTTCTATATCTTGCAGGTCTAGTCAGAGCCTG  
GAATATAGTGATGGATACCTTATTTGGAATGGTACCTACAGAAGCCAGGCCAGTCTCCACAGCTCCTCATCTATGAAGTTTCCAA  
CCGATTTTCTGGGGTCCCAGACAGGTTCA TTGGCAGTGGGTGAGGGACAGATTTACCCTCAAGATCAGCAGAGTAGAGCCTGAG  
GACTTGGGAGTTTATTACTGCTTCCAAGCTACACATGATCCTCC

>rIGKV2U3 ; wgs

GATGTTGTGCTGACCCAGACTCCACCCACTTTATCGGCTACCATTGGACAATCGGTCTCCATCTCTTGCAGGTCAAGTCAGAGTCTC  
TTAGATAGTGATGGAGATACCTATTTAAATTGGTTGCTACAGAGGCCAGGCCAATCTCCACAGCTTCTAATTTATTCGGTATCCAAC  
CTGGAATCTGGGGTCCCCAACAGGTTCA GTGGCAGTGGGTGAGAAACAGATTTCACTCAAATCAGTGGAGTGGAGGCTGAA  
GATTTGGGAGTTTATTACTGCATGCAAGCTACCCATGCTCCTCT

>rIGKV2U13 ; wgs

GATATTGTGATGACTCAAGCTCCACTCTCTGTATCTGTCACTCCTGGAGAGTCAGCTTCCATCTCCTGCAGATCTAGTAAGAGTCTG  
CTAAGTAGTAAGGGCATCACTTCTTGTATTGGTACCTCAGAGGCCAGGAAAGTCTCCTCAGCTCCTGATATATCGGATGTCCAA  
CCTTGCCTCAGGAGTTCCAGACAGGTTTAGTGGCAGTGGGTGAGAAACCGATTTTACTGAAAATCAGTAAGGTGGAGACTGAG  
GATGTTGGTGTTTATTACTGTGGACATCGGTCTAGAATATCCTCC

>rlGKV2U17 ; wgs

GATATTGTGATGACCCAGGGTGCCTCCCAATCCTGTCCCTTCTGGAGAGTCAGCTTCCATCACCTGCCAGTCTAGTAAGAGTCT  
GCTGCACAGCAATGGCAAGACATACTTGAATTGGTATCTGCAGAGGCCAGGACAGTCTCCTCAGCTCCTGATCTATTGGATGTCTA  
CCCGTGCATCAGGAGTCTCAGACAGGTTTCAGTGGCAGTGGGTTCAGGAACAGATTTTCACTGAAAATCAGTAGCGTGGAGGCTG  
AGGATGTGGGTGTGTATTACTGTCAGCAATTTCTAGAGTATCCTC

>rlGKV2U18 ; wgs

GATATTGTGTTGACTCAAGCTCCACTCTCTGTATCTGTCCTCCTGGAGAGTCAGCTTCCATCTCCTGCAGGTCTAGTAAGAGTCTG  
CTAAGTAGTAAGGGCATCACTTCCTTGTATTGGTACCTTCAGAGGCCAGGAAAGTCTCCTCAGCTCCTGATATATCAGATGTCCAA  
CCTTGCCTCAGGAGTTCCAGACAGGTTTAGTAGCAGTGGGTTCAGAAACAGATTTTACTGAAAATCAGTAAGGTGGAGACTGAG  
GATGTTGGTGTATTACTGTGGACATCGTCTAGAATATCCTCC

>rlGKV3U19 ; wgs

GACATTGTGCTGACCCAGTCTCCTGCTTTGGCTGTGTCTCTAGAGCAGAGAGCCACCATCTCTTGCAAACCAGCCAGAATGTGCA  
TAATTATGGCATTAGTTATATGCACTGGTACCAACAGAAACCAGGACAGCAACCCAACTCCTCATCTATGGTGCATCCAACCTAG  
AGTCTGGAGTCCCTGCCAGGTTTCAGTGGCAGTGGGTCTGGGACAGACTTCACCCTCACCATCGATCCTGTGGAGGCTGATGATAT  
TGCAACCTATTACTGTCAGCAGAGTAAGGATTATCCTCC

>rlGKV4U34 ; wgs

GAAATTGTGCTAACCAGTCTCCAACAACCATGGCTGCATCTCCGGGGGAGAAGGTCACCATCACCTGCCGTGCCAGCTCCAGTG  
TAAGCTACATGTAAGTACCAGCAGAAGTCAGGCGCCTCCCCTAAACCCTGGATTTATGAAACATCCAACTGGCTTCTGGAGTC  
CCAGATCGCTTCAGTGGCAGTGGGTCTGGGACCTCTTATTCGTTACAATCAGCTCCATGGAGACTGAAGATGCTGCCACTTATTA  
CTGTCACCAGTGGAGTAGTACCCACCCA

>rlGKV8U28 ; wgs

GACATTGTGATGACCCAGACTCCATCCTCCCAGGCTGTGTCAGCAGGGGAGAAGGTCATATGAGCTGCAAGTCCAGTCAGAGTC  
TTTTATACAGTGGAGACCAAAAGAACTACTTGGCCTGGTACCAGCAGAAACCTGGGCAGTCTCCTAAACTGCTGATCTACTTGGCA

TCCACTAGGGAATCAGGGTCCCTGATCGCTTCATAGGCAGTGGATCTGGGACAGACTTCACTCTGACCATCAGCAGTGTGCAGG  
CTGAAGATCTGGCAGATTATTACTGTCAGCAGCATTACAGCTATCCTCC

>rIGKV8U29 ; wgs

GACATTGTGATGACCCAGTCTCCCTCCCTGGCTGTGTCAGCAGGAGACAAGGTCACTATGAGCTGCAAGTCCAGTCAGAGTCT  
TTTATCCAGTGAATACCAAGGGAAGTACTTGTCTGGTTCCAGCAGAAACCAGGGCAGTCTCCTAAACTGCTGATCTCCTTGGCAT  
CCACTAGGGAAACTGGTGTCCCTGATCGCTTCATAGGCAGTGGATCTGGGACAGACTTCACTCTGACCATCAGCAGTGTGCAGGC  
TGAAGACCTGGCTGTTTATTACTGTGAGCAGTACTACAGCTATCCTCC

>rIGKV8U40 ; wgs

ACATTGTGATGACCCAGACTCCATCCTCCCAGGCTGTGTCAGCAGGGGAGAAGGTCACTATGAGCTGCAAGTCCAGTCAGAGTCT  
TTTATACAGTGA AAAACAAAAGAACTACTTGGCCTGGTACCAGCAGAAACCAGGGCAGTCTCCTAAACTGCTGATCTACTGGGCA  
TCCACTAGGGAATCTGGGGTCCCTGATCGCTTCATAGGCAGTGGATCTGGGACAGATTTCACTCTGACCATCAGCAGTGTGCAGG  
CAGAAGACCTGGCTGTTTATTACTGCCAGCAGTACTATAACTTTCTCC

>rIGKV10U55 ; wgs

GACATCAAGATGACCCAGTCTCCCTCCCTGTCTGCATCTCTGGGAGAAAGAGTCACCATCAGTTGCAGGGCAAGTGAGAATAT  
TAACAATATTTTGGCCTGGTATCAGAAGAAAGAAGATGGAAGTGTTAAACTCCTGATTTACTACACATCAAATCTACAATCTGGGG  
TCCCATCAAGGTTCAAGTGGCAGTGGGTCTGGGAAAGATTACTCTTTACCATTAGTGGCCTAGAATCTGAAGATATTGCGACTTAC  
TATTGTCAGCAAGGTTATACCCACC

>rIGKV12U30 ; wgs

GACATCCAGATGACACAGTCTCCAGCTTCCCTGTCTGCATCTCTGGGAGAAACTGTCACCATCGAATGTCGAGCAAGTGAGGACAT  
TTACAGTAATTTAGCGTGGTATCAGCAGAAACCAGGGAAGTCTCCTCAGCTCCTGATCTATGATGCAAATAGCTTGGCAGATGGG  
GTCCCATCACGGTTCAGTGGCAGTGGATCTGGCACACAGTATTCTCTAAAGATAAACAGCCTGCAATCTGAAGATGTCGCAAGTTA  
TTTCTGTCAACAGTATAACAATTATCCTCC

>rlGKV12U74 ; wgs

GACATCCAGATGACACAGTCTCCAGCTTCCCTGTCTGCATCTCTGGGAGAACTATCTCCATCGAATGTCTAGCAAGTGAGGGCAT  
TTCCAGTTATTTAGCGTGGTATCAGCAGAAAGCCAGGGAAATCTCCTCAGCTCCTGATCTATGGTGCAAATAGCTTGCAAGCTGGGG  
TCCCATCACGGTTCAGTGGCAGTGGATCTGGCACACAGTATTCTCTCAAGATCAGCAGCATGCAACCTGAAGATGAAGGGGATTA  
TTTCTGTCAACAGAGTTACAAGTTTCCTCC

>rlGKV12U76 ; wgs

GACATCCAGATGACACAGTCTCCTGCCTCCCTGTCTGCATCTCTGGAAGAAATTGTCACCATCACATGTCAGGCAAGCCAGGACAT  
TGGTAATTGGTTGGCATGGTATAAGCAGAAACCAGGGAAATCTCTTCAGCTCCTGATCAATGATGCAACCAGCTTGGCAGACGGG  
GTCCCATCAAAGTTCAGAGGCAGTAGATCTGGTACACAGTATTCTCTTAAGATCAGCAGACTACAGGATGAAGATTTTGGAAAGCT  
ATTACTGTCAACAGGCTCATAGTAATCCTCC

>rlGKV12U78 ; wgs

GACATCCAGATGACACAGTCTCCTGCCTCCCTGTCTGCTTCTCTGGAAGAAATTGTCACCATCACCTGCAAGGCAAGCCAGGGCAT  
TGATGATTACTTATCATGGTATCAGCAGAAACCAGGGAAATCTCCTCAGCTCCTGATCTATGATGCAACCAGCTTGGCAGATGGGG  
TCCCATCACGGTTCAGCGGCAGTAGATCTGGCACACAGTATTCTCTTAAGATCAGCAGACCACAGGTTGATGATTCTGGAATCTAT  
TACTGTCTACAGAGTTACAGTACTCCTCC

>rlGKV12U81 ; wgs

GACATCCAGATGACACAGTCTCCTGCCTCCCTGTCTGCATCTCTGGAAGAAATTGTCACCATCACATTCCAGGCAAGCCAAGACAT  
TGGTAATTGGTTGGCATGGTATCAGCAGAAACCGGGGAAATCTCCTCAGCTCCTGATTTATGATGCAACCAGCTTGGCAGATGGG  
GTCCCATCACGGTTCAGCGGCAGTAGATCTGGCACACAGTATTCTCTTAAGATCAGCAGACTACAGGTTGAAGATATTGGAAGCT  
ATTACTGTCAACAGGCTCATAGTAATCCTCC

>rlGKV15U51 ; wgs

GACATCCAGATGACCCAGTCTCCTTCACTCCTGTCTGCATCTGTGGGAGACAGAGTCACTCTCAACTGCAAAGCAAGTCAGAATAT  
TTATAAGAACTTAGAGTGGTATCAGCAAAAGCATGGAGAAGCTCCAAAACCTCCTGATATATTATACAAACAATTTGCAAACGGGC

ATCTCATCAAGGTTTCAGTGGCAGTGGATCTGGTACAGATTACACACTCACCATCAGCAGCCTGCAGCCTGAAGATGTTGCCACATA  
TTACTGCTATCAGTATAACAGCGGGCCC

>rlGKV16U47 ; wgs

GATGTCCAGATGACCCAGTCTCCGTCTTATCTTGCTGCGTCTCCTGGAGAAAGTGTTCATCAGTTGCAAGGCAAGTAAGAGCAT  
TAGCAATTATTTAGCCTGGTATCAACAGAAACCTGGGGAAGCAAATAAGCTTCTTATCTACTCTGGGTCAACTTTGCAATCTGGAA  
CTCCATCGAGGTTTCAGTGGCAGTGGATCTGGTACAGATTTCACTCTCACCATCAGAAACCTGGAGCCTGAAGATTTTGCAGTCTAC  
TACTGTCAACAGTATTATGAAAAACCACATC

>rlGKV22U24 ; wgs

GACATCAAGATGACCCAGTCTCCTTCATTCCTGTCTGCATCTGTGGGAGACAGAGTCACTATCAACTGCAAAGCAAGTCAGAATAT  
TAACAAGTACTTAAACTGGTATCAGCAAAGCTTGGAGAAGCTCCCAAACCTCCTGATATATAATACAAACAATTTGCAAACGGGCA  
TCCCATCAAGGTTTCAGTGGCAGTGGATCTGGTACTGATTTCACTCACCATCAGCAGCCTGCAGCCTGAAGATGTTGCCACATAT  
TTCTGCTTGCAGCATAATAGTAGGCCG

>rlGKV22U25 ; wgs

GACATCCAGATGACCCAGTCTCCTTCATTCCTGTCTGCATCTGTGGGAGAAAGAGTCACTCTCAGCTGCAGAGCAAGTCAGAATAT  
TAACAAGTACTTAGACTGGTATCAGCAAAGCTTGGAGAAGCTCCCAAACCTCCTGATATATAATACAAACAATTTGCATACGGGCA  
TCCCATCAAGGTTTCAGTGGCAGTGGATCTGGTACAGATTACACACTCACCATCAGCAGCCTGCAGCCTGAAGATGTTGCCACATAT  
TTCTGCTTGCAGCGTAATAGTTGGCCG

>rlGKV22U26 ; wgs

GACATCCAGATGACCCAGTCTCCTTCAGTCTGTCTGCATCTGTGGGAGACAGAGTCACTCTCAACTGCAAAGCAAGTCAGAATAT  
TAACAAGTACTTAAACTGGTATCAGCAAAGCTTGGAGAAGCTCCCAAACCTCCTGATATATAATACAAACAATTTGCAAACGGGCA  
TCCCATCAAGGTTTCAGTGGCAGTGGATCTGGTACAGATTACACACTCACCATCAGCAGCCTGCAGCCTGAAGATGTTGCCACATAT  
TTCTGCTTTCAGCATAATAGTTGGCCG

>rlGKV22U27 ; wgs

GACATCCAGATGACCCAGTCTCCTTCACTCCTGTCTGCATCTGTGGGAGACAGAGTCACTATCAACTGCAAAGCAAGTCAGAATAT  
TAACAAGTACTTAAACTGGTATCAGCAAAGCTTGGAGAAGCTCCCAAACCTCTGATATATAATACAAACAATTTGCAAACGGGCA  
TCCCATCAAGGTTCAAGTGGCAGTGGATCTGGTACAGATTACACACTCACCATCAGCAGCCTGCAGCCTGAAGATTTTGGCACATAT  
TTCTGCTTTCAGCATAATAGTTGGCCC

>rlGKV22U33 ; wgs

GACATCCAGATGACCCAGTCTCCTTCATTCCTGTCTGCAACTGTGGGAGACAGAGTCACTATCAACTGCAAAGCAAGTCAGAATAT  
TAACAAGTACTTAAACTGGTATCAGCAAAGCTTGGAGAAGCTCCCAAACGCCTGATATATAATACAAACAGTTTGCAAACCTGGCA  
TTCCATCAAGGTTCAAGTGGCAGTGGATCTGGTACAGATTACACACTCACCATCAGCAGCCTGCAGCCTGAAGATGTTGCTACATAT  
TTCTGCTTGCAGCATAATAGTGGGCCC

>rlGKV22U53 ; wgs

AACATCCAGCTGACCCAGTCTCCTTCACTCCTGTCTGCATCTGTGGGAGACAGAGTCACTCTTAGCTGCAAAGGAAGTCAGAATAT  
TAACAATTACTTAGCCTGGTACCAACAAAAGCTTGGAGAAGCTCCCAAACCTCTGATATATAATACAAACAGTTTGCAAACGGGCA  
TCCCATCAAGGTTCAAGTGGCAGTGGATCTGGTACAGATTACACACTCACCATCAGCAGCCTGCAGCCTGAAGATGTTGCCACATAT  
TTCTGCTATCAGTATAACAACGGGTAC

>rlGKV22U72 ; wgs

GACATCCAGATGACCCAGTCTCCTTCACTCCTGTCAGCATCTGTGGGAGACAGAGTCACTCTCAGCTGCAAAGCAAGTCAGAGTAT  
TTACAGCAGCTTAGCCTGGTATCAGCAAAGCTTGGAGAAGCTCCCAAACCTCTGATATATAGTGCAAACAGTTTGCAAACGGGC  
ATCCCGTCAAGGTTCAAGTGGCAGTGGATATGGTACAGATTTCACTCACCATCAGCAGCCTGCAGCCTGAAGATGTTGCCACATA  
TTTCTGCCATCAGTATTACAGTTGGCCC

>rlGKVxU54 ; wgs

GATATTCAAGTGACTCAATCTCCATCCTCCCTTTGGCATCTCTAGGAGAGAGAGTCACTATCACATGCCAGACAAGTCAGAGCAT  
TAGCAATAACCTAAACTGGTATCAGCAGAAACCAGGACAAGCTCCTATGCTCTTGATCTATTATGCAACCAGTTTGCAACTGGCA

TGCCATCAAGGTTTCAGTGGCCAATATTCTGGGAGAAGTTTCACTCTAACCATCACTAGCCTGGAGCCAGAAGATATTGCAAATTAT  
TTTTGTCTGCAGCATTACAGTGCTCCTCA

>riGKVxU84 ; wgs

GATATCCAGATGAACCAGACTCCATCTACTCTATCTATGTCTATTGGAGAACGAGTAATTATTAATTGCCATGCCAGTGAGATCATT  
AATACTTGGTTATCCTGGCACCAGCAGAAACCAGAGAATGCGCCACA ACTACTCATCTCTAAGGCATCCA ACTTCCATACTGAGGT  
TCCATCAAGGTTTCAGTGGCAGTGGATCTGGAACAGATTACTCTCTCAGCAGCAGCAGCCTCGAGCCTGAAGACATTGCTACTTACT  
ACTGTGTACAGGCTAAGAGTCTTCCTCC
